1 **Genomic Diversity of *Escherichia coli* isolates from healthy children in rural Gambia**

2 Ebenezer Foster-Nyarko<sup>1,2</sup>, Nabil-Fareed Alikhan<sup>1</sup>, Usman Nurudeen Ikumapayi<sup>2</sup>, Sarwar

3 Golam<sup>2</sup>, M Jahangir Hossain<sup>2</sup>, Catherine Okoi<sup>2</sup>, Peggy-Estelle Tientcheu<sup>2</sup>, Marianne

4 Defernez<sup>1</sup>, Justin O’Grady<sup>1</sup>, Martin Antonio<sup>2,3</sup>, Mark J. Pallen<sup>1,4#</sup>

5

6

7 <sup>1</sup> Quadram Institute Bioscience, Norwich Research Park, Norwich, Norfolk, United Kingdom

8 <sup>2</sup> Medical Research Council Unit The Gambia at the London School of Hygiene and Tropical

9 Medicine, Atlantic Boulevard Road, Fajara, the Gambia

10 <sup>3</sup> Warwick Medical School, University of Warwick, Coventry, United Kingdom

11 <sup>4</sup> School of Veterinary Medicine, University of Surrey, Guildford, Surrey, United Kingdom

12

13

14 **#Corresponding author:** Professor Mark J. Pallen, Quadram Institute Bioscience, Norwich

15 Research Park, Norwich, Norfolk, United Kingdom

16 Email: Mark.Pallen@quadram.ac.uk

17

18 **Abstract**

19 Little is known about the genomic diversity of *Escherichia coli* in healthy children from sub-  
20 Saharan Africa, even though this is pertinent to understanding bacterial evolution and  
21 ecology and their role in infection. We isolated and whole-genome sequenced up to five  
22 colonies of faecal *E. coli* from 66 asymptomatic children aged three-to-five years in rural  
23 Gambia (n=88 isolates from 21 positive stools). We identified 56 genotypes, with an average  
24 of 2.7 genotypes per host. These were spread over 37 seven-allele sequence types and all  
25 eight significant phylogroups of *E. coli*. Immigration events accounted for three quarters of  
26 the diversity within our study population, while one quarter of variants appeared to have  
27 arisen from within-host evolution. Several study strains were closely related to isolates  
28 that caused disease in humans or originated from livestock. Our results suggest that within-  
29 host evolution plays a minor role in the generation of diversity than independent immigration  
30 and the establishment of strains among our study population. Also, this study adds  
31 significantly to the number of commensal *E. coli* genomes, a group that has been traditionally  
32 underrepresented in the sequencing of this species.

33

34 **Words: 184**

35 **Keywords:** *Escherichia coli*, genomic diversity, within-host evolution.

36

37

38 **Introduction**

39 Ease of culture and genetic tractability account for the unparalleled status of *Escherichia coli*  
40 as “the biological rock star”, driving advances in biotechnology (1), while also providing key  
41 insights into biology and evolution (2). However, *E. coli* is also a widespread commensal, as  
42 well as a versatile pathogen, linked to diarrhoea (particularly in the under-fives), urinary tract  
43 infection, neonatal sepsis, bacteraemia and multi-drug resistant infection in hospitals (3-5).  
44 Yet most of what we know about *E. coli* stems from investigation of laboratory strains, which  
45 fail to capture the ecology and evolution of this key organism “in the wild” (6) What’s more,  
46 most studies of non-lab strains have focused on pathogenic strains or have been hampered by  
47 low-resolution PCR methods, so we have relatively few genomic sequences from commensal  
48 isolates, particularly from low- to middle-income countries (7-13).

49 We have a broad understanding of the population structure of *E. coli*, with eight major  
50 phylogroups loosely linked to ecological niche and pathogenic potential (B2, D and F linked  
51 to extraintestinal infection; A and B1 linked to severe intestinal infections such as  
52 haemolytic-uraemic syndrome) (14-17), All phylogroups can colonise the human gut, but it  
53 remains unclear how far commensals and pathogenic strains compete or collaborate with one  
54 another—or engage in horizontal gene transfer—within this important niche (18, 19).

55 Although clinical microbiology typically relies on single-colony picks (which has the  
56 potential to underestimate species diversity and transmission events), within-host diversity of  
57 *E. coli* in the gut is crucial to our understanding of inter-strain competition and co-operation  
58 and also for accurate diagnosis and epidemiological analyses. Pioneering efforts using  
59 serotyping and molecular typing have shown that normal individuals typically harbour more  
60 than one strain of *E. coli* (20-22), with one individual carrying 24 distinct clones (22-24).  
61 More recently, whole-genome sequencing has illuminated molecular epidemiological

62 investigations (9), adaptation during and after infection (25, 26), as well as the intra-clonal  
63 diversity in healthy hosts (27).

64 There are two plausible sources of within-host genomic diversity. Although, a  
65 predominant strain usually colonises the host for extended periods (28), successful  
66 immigration events mean that incoming strains can replace the dominant strain or co-exist  
67 alongside it as minority populations (29). Strains originating from serial immigration events  
68 are likely to differ by hundreds or thousands of single-nucleotide polymorphisms (SNPs).  
69 Alternatively, within-host evolution can generate clouds of intra-clonal diversity, where  
70 genotypes differ by just a handful of SNPs (20).

71 Most relevant studies have been limited to Western countries, with the exception of a  
72 recent report from Tanzania (21), so little is known about the genomic diversity of *E. coli* in  
73 sub-Saharan Africa. The Global Enteric Multicenter Study (GEMS) (30, 31) has documented  
74 a high burden of diarrhoea attributable to *E. coli* (including *Shigella*) among children from  
75 the Gambia, probably as a result of increased exposure to this organism through poor hygiene  
76 and frequent contact with animals and the environment. In also facilitating access to stool  
77 samples from healthy Gambian children, the GEMS study has given us a unique opportunity  
78 to study within-host genomic diversity of commensal *E. coli* in this setting.

79

## 80 **Methods**

### 81 **Study population**

82 We initially selected 76 faecal samples from three- to five-year-old asymptomatic Gambian  
83 children, who had been recruited from Basse, Upper River Division, the Gambia, into the  
84 GEMS study (30) as healthy controls from December 1, 2007 to March 3, 2011. Samples had  
85 been collected according to a previously described sampling protocol (32). Archived stool  
86 samples were retrieved from -80°C storage and allowed to thaw on ice. A 100-200 mg aliquot

87 from each sample was transferred aseptically into 1.8ml Nunc tubes for microbiological  
88 processing below (Figure 1). Eleven of the original 76 samples proved unavailable for  
89 processing in this study.

90

### 91 **Bacterial growth and isolation**

92 1 ml of physiological saline (0.85%) was added to each sample tube and vigorously vortexed  
93 at 4200 rpm for at least 2 minutes. Next, the homogenised sample suspensions were taken  
94 through four ten-fold dilution series. A100 µl aliquot from each dilution was then spread  
95 evenly on a plate of tryptone-bile-X-glucuronide differential and selective agar. The  
96 inoculated plates were incubated overnight at 37°C under aerobic conditions. Colony counts  
97 were performed on the overnight cultures for each serial dilution for translucent colonies with  
98 entire margins and blue-green pigmentation indicative of *E. coli*. Up to five representative  
99 colonies were selected from each sample and sub-cultured on MacConkey agar overnight at  
100 37°C before storing in 20% glycerol broth at -80°C. Individual isolates were assigned a  
101 designation comprised of the subject ID followed by the colony number (“1-5”).

102

### 103 **Genomic DNA extraction and genome sequencing**

104 Broth cultures were prepared from pure, fresh cultures of each colony-pick in 1 ml Luria-  
105 Bertani broth and incubated overnight to attain between  $10^9 - 10^{10}$  cfu per ml. Genomic DNA  
106 was then extracted from the overnight broth cultures using the lysate method described in  
107 (33). The eluted DNA was quantified by the Qubit high sensitivity DNA assay kit  
108 (Invitrogen, MA, USA) and sequenced on the Illumina NextSeq 500 instrument (Illumina,  
109 San Diego, CA) as described previously (34).

110 Following Dixit et al. (20), we sequenced a random selection of isolates twice, using DNA  
111 obtained from independent cultures, to help in the determination of clones and the analysis of

112 within-host variants (Supplementary File 5). Bioinformatic analyses of the genome sequences  
113 were carried out on the Cloud Infrastructure for Microbial Bioinformatics (CLIMB) platform  
114 (35).

115

### 116 **Phylogenetic analysis**

117 The paired 150bp reads were quality checked and assembled, as previously described (34).

118 Snippy v4.3.2 (<https://github.com/tseemann/snippy>) was used for variant calling, using the

119 complete genome sequence of commensal *E. coli* str. K12 substr. MG1655 as a reference

120 strain (NCBI accession: NC\_000913.3) and to generate a core-genome alignment, from

121 which a maximum-likelihood phylogeny with 1000 bootstrap replicates was reconstructed

122 using RAxML v8.2.4 (36), based on a general time-reversible nucleotide substitution model.

123 The phylogenetic tree was rooted using the genomic sequence of *E. fergusonii* as an outgroup

124 (NCBI accession: GCA\_000026225.1). The phylogenetic tree was visualised in FigTree

125 v1.4.3 (<https://github.com/rambaut/figtree/>) and annotated in RStudio v3.5.1 and Adobe

126 Illustrator v 23.0.3 (Adobe Inc., San Jose, California). For visualisation, a single colony was

127 chosen to represent replicate colonies of the same strain (ST) with identical virulence,

128 plasmid and antimicrobial resistance profiles and a de-replicated phylogenetic tree

129 reconstructed using the representative isolates.

130

### 131 **Multi-locus sequence typing, Clermont typing and SNPs**

132 The merged reads were uploaded to Enterobase (37), where *de novo* assembly and genome

133 annotation were carried out and *in-silico* multi-locus sequence types (STs) assigned based on

134 the Achtman scheme, allocating new sequence types (ST) if necessary. Enterobase assigns

135 phylogroups using ClermontTyper and EzClermont (38, 39) and unique core-genome MLST

136 types based on 2, 513 core loci in *E. coli*. Publicly available *E. coli* sequences in Enterobase

137 (<http://enterobase.warwick.ac.uk/species/index/ecoli>) (37) were included for comparative  
138 analysis, including 23 previously sequenced isolates obtained from diarrhoeal cases recruited  
139 in the GEMS study in the Gambia (Supplementary File 1).

140 We computed pairwise single nucleotide polymorphism (SNP) distances between  
141 genomes from the core-genome alignment using `snp-dists` v0.6  
142 (<https://github.com/tseemann/snp-dists>). For the duplicate sequence reads of the same strains,  
143 we used `SPAdes` v3.13.2 (40) to assemble each set of reads and map the raw sequences from  
144 one sequencing run to the assembly of the other run and vice versa, as described previously  
145 (20). SNPs were detected using the `CSIPhylogeny` tool  
146 (<https://cge.cbs.dtu.dk/services/CSIPhylogeny/>) and compared between the two steps,  
147 counting only those SNPs that were detected in both sets of reads as accurate.

148

#### 149 **Accessory gene content**

150 We used `ABRicate` v0.9.8 (<https://github.com/tseemann/abricate>) to predict virulence factors,  
151 acquired antimicrobial resistance genes and plasmid replicons by scanning the contigs against  
152 the VFDB, ResFinder and PlasmidFinder databases respectively, using an identity threshold  
153 of  $\geq 90\%$  and a coverage of  $\geq 70\%$ . Virulence factors and AMR genes were plotted next to the  
154 phylogenetic tree using the `ggtree`, `ggplot2` and `phangorn` packages in RStudio v3.5.1. We  
155 calculated co-occurrence of AMR genes among study isolates and visualised this as a heat  
156 map using RStudio v 3.5.1.

157

#### 158 **Population structure and comparison of commensal and pathogenic strains**

159 We assessed the population structure using the hierarchical clustering algorithm in  
160 `EnteroBase`. Briefly, the isolates were assigned stable population clusters at eleven levels  
161 (from HC0 to HC 2350) based on pairwise `cgMLST` allelic differences. Hierarchical

162 clustering at 1100 alleles differences (HC1100) resolves populations into cgST complexes,  
163 the equivalent of clonal complexes achieved with the legacy MLST clustering approaches  
164 (37). We reconstructed neighbour-joining phylogenetic trees using NINJA (41), based on  
165 clustering at HC1100 to display the population sub-clusters at this level as an indicator of the  
166 genomic diversity within our study population and to infer the evolutionary relationship  
167 among our strains and others in the public domain.

168 Next, we interrogated the HC1100 clusters that included both pathogenic and commensal  
169 *E. coli* strains recovered from the GEMS study. For the clusters that encompassed commensal  
170 and pathogenic strains belonging to the same ST, we reconstructed both neighbour-joining  
171 and SNP phylogenetic trees to display the genetic relationships among these strains. We  
172 visualised the accessory genomes for the overlapping STs mentioned above to determine  
173 genes associated with phages, virulence factors and AMR. The resulting phylogenetic trees  
174 were annotated in Adobe Illustrator v 23.0.3 (Adobe Inc., San Jose, California).

175

## 176 **Ethical statement**

177 The study was approved by the joint Medical Research Council Unit The Gambia-Gambian  
178 Government ethical review board.

179

## 180 **Results**

### 181 **Population structure**

182 The study population included 27 females and 39 males (Table 1). All but one reported the  
183 presence of a domestic animal within the household. 21 samples proved positive for growth  
184 of *E. coli*, yielding 88 isolates. We detected 37 seven-allele sequence types (STs) among the  
185 isolates, with a fairly even distribution (Figure 2). Five STs were completely novel (ST9274,  
186 ST9277, ST9278, ST9279 and ST9281). These study strains were scattered over all the eight



187 main phylogroups of *E. coli* (Table 2). Hierarchical clustering of core genomic STs revealed  
188 twenty-seven cgST clonal complexes (Supplementary File 2).

189

### 190 **Within-host diversity**

191 Nine individuals were colonised by just a single ST, six carried two STs, four carried four  
192 STs and two carried six STs. We found 56 distinct genotypes, which equates to an average of  
193 2.7 genotypes per host. Two individuals (H-18 and H-2) shared an identical strain belonging  
194 to ST9274 (zero SNP difference) (Supplementary File 4, yellow highlight), suggesting recent  
195 transfer from one child to another or recent acquisition from a common source.

196 We observed thirteen cases where a single host harboured two or more variants within the  
197 same SNP cloud (Table 2). Such within-host evolution accounted for around a quarter of the  
198 observed variation, with immigration explaining the remaining three quarters. 22% of within-  
199 host mutations represented synonymous changes. 43% were non-synonymous mutations,  
200 while 31% occurred in non-coding regions and 4% represented stop-gained mutations  
201 (Supplementary File 6). The average number of SNPs among variants within such SNP  
202 clouds was 5 (range 0-18) (Table 3). However, in two subjects (H36 and H37), pairwise  
203 distances between genomes from the same ST (ST59 and ST5148) were as large as 14 and 18  
204 SNPs respectively (Supplementary File 4, grey highlight).

205

### 206 **Accessory gene content and relationships with other strains**

207 A quarter of our isolates were most closely related to commensal strains from humans, with  
208 smaller numbers most closely related to human pathogenic strains or strains from livestock,  
209 poultry or the environment (Table 4). One isolate was most closely related to a canine isolate  
210 from the UK. Three STs (ST38, ST10 and ST58) were shared by our study isolates and  
211 diarrhoeal isolate from the GEMS study (Supplementary Figure 2), with just eight alleles

212 separating our commensal ST38 strain from a diarrhoeal isolate from the GEMS study  
213 (Figure 5).

214 We detected 125 genes encoding putative virulence factors across the 88 study isolates  
215 (Figure 2; Supplementary File 3). More than half of the isolates encoded resistance to three or  
216 more clinically relevant classes of antibiotics (Figure 3; Supplementary Figure 1). The most  
217 common resistance gene network was *-aph(6)-Id\_1-sul2* (41% of the isolates), followed by  
218 *aph(3'')-Ib\_5-sul2* (27%) and *bla-TEM-aph(3'')-Ib\_5* (24%). Most isolates (67%) harboured  
219 two or more plasmid types (Figure 4). Of the 24 plasmid types detected, IncFIB was the most  
220 common (41%), followed by col156 (19%) and IncI\_1-Alpha (15%). Nearly three quarters of  
221 the multi-drug resistant isolates carried IncFIB (AP001918) plasmids, suggesting that these  
222 large plasmids disseminate resistance genes within our study population.

223

## 224 **Discussion**

225 This study provides an overview of the within-host genomic diversity of *E. coli* in healthy  
226 children from a rural setting in the Gambia, West Africa. Surprisingly, we recovered a low  
227 rate of colonisation than reported elsewhere among children of similar age groups (42), with  
228 only a third of our study samples yielding growth of *E. coli*. This may reflect geographical  
229 variation but might also be some hard-to-identify effect of the way the samples were handled,  
230 even though they were kept frozen and thawed only just before culture.

231 Several studies have shown that sampling a single colony is insufficient to capture *E. coli*  
232 strain diversity in stools (20, 21, 23). Lidin-Janson *et al.* (43) claim that sampling five  
233 colonies provides a >99% chance of recovering dominant genotypes from single stool  
234 specimens, while Schlager *et al.* (24) calculate that sampling twenty-eight colonies provides a  
235 >90% chance of recovering minor genotypes. Our results confirm the importance of multiple-

236 colony picks in faecal surveillance studies, as over half (57%) of our strains would have been  
237 missed by picking a single colony.

238 Although our strains encompassed all eight major phylotypes of *E. coli*, the majority fell  
239 into the A and B1 phylogenetic groups, in line with previous reports that these phylogroups  
240 dominate in stools from people in low- and middle-income countries (44, 45). The prevalence  
241 of putative virulence genes in most of our isolates highlights the pathogenic potential of  
242 commensal intestinal strains—regardless of their phylogroup—should they gain access to the  
243 appropriate tissues, for example, the urinary tract. Our results complement previous studies  
244 reporting genomic similarities between faecal *E. coli* isolates and those recovered from  
245 urinary tract infection (25, 46).

246 We found that within-host evolution plays a minor role in generation of diversity, in line  
247 with Dixit et al. (20), who reported that 83% of diversity originates from immigration events,  
248 and with epidemiological data suggesting that the recurrent immigration events account for  
249 the high faecal diversity of *E. coli* in the tropics (47). Co-colonising variants belonging to the  
250 same ST tended to share an identical virulence, AMR and plasmid profile, signalling  
251 similarities in their accessory gene content. The estimated mutation rate for *E. coli* lineages is  
252 around one SNP per genome per year (48), so that two genomes with a most recent common  
253 ancestor in the last five years would be expected to be around ten SNPs apart. However, in  
254 two subjects, pairwise distances between genomes from the same ST (ST59 and ST5148)  
255 were large enough (14 and 18 respectively) to suggest that they might have arisen from  
256 independent immigration events, as insufficient time had elapsed in the child's life for such  
257 divergence to occur within the host. However, it remains possible that the mutation rate was  
258 higher than expected in these lineages, although we found no evidence of damage to DNA  
259 repair genes. More than half of our isolates encode resistance to three or more classes of  
260 antimicrobials echoing the high rate of MDR (65%; confirmed by phenotypic testing) in the

261 GEMS study. IncFIB (AP001918) was the most common plasmid Inc type from our study, in  
262 line with the observation that IncF plasmids are frequently associated with the dissemination  
263 of resistance (49). However, a limitation of our study is that we did not perform phenotypic  
264 antimicrobial resistance testing, although Doyle et al. (50) reported that only a small  
265 proportion of genotypic AMR predictions are discordant with phenotypic results.

266 Comparative analyses confirm the heterogeneous origins of the strains reported here,  
267 documenting links to other human commensal strains or isolates sourced from livestock or  
268 the environment. This is not surprising, as almost all study participants reported that animals  
269 are kept in their homes and children in rural Gambia are often left to play on the ground,  
270 close to domestic animals such as pets and poultry (51).

271 Our results show that the commensal *E. coli* population in the gut of healthy children in  
272 rural Gambia is richly diverse, with the independent immigration and establishment of strains  
273 contributing to the bulk of the observed diversity. In addition, this work has added  
274 significantly to the number of commensal *E. coli* genomes, which are underrepresented in  
275 public repositories. Although solely observational, our study paves the way for future studies  
276 aimed at a mechanistic understanding of the factors driving the diversification of *E. coli* in  
277 the human gut and what it takes to make a strain of *E. coli* successful in this habitat.

278

## 279 **Acknowledgements**

280 We gratefully acknowledge the study participants in GEMS and all clinicians, field workers  
281 and the laboratory staff of the Medical Research Council Unit The Gambia at London School  
282 of Hygiene and Tropical Medicine involved in the collection and storage of stools in the  
283 GEMS study in Basse Field Station and Fajara.

284

## 285 **Data summary**

286 All genomic assemblies for the strains included in this study are freely available from  
287 EnteroBase (<http://enterobase.warwick.ac.uk/species/index/ecoli>). The EnteroBase genome  
288 assembly barcodes are provided in Supplementary Files 1 and 2.

289 The raw genomic sequences have been deposited in the NCBI SRA, under the BioProject  
290 ID PRJNA658685 and accession numbers SAMN15880286 to SAMN15880281.

291

### 292 **Conflicts of interest**

293 We declare no conflicts of interest.

294

### 295 **Author contributions**

296 Conceptualization: MA, MP; data curation, MP, NFA; formal analysis: EFN; analytical  
297 support: MD; funding: MA and MP; sample collection and storage: MJH, UNI, PET, CO;  
298 data management: SG; laboratory experiments, EFN, supervision, NFA, MP, JO, MA;  
299 manuscript preparation – original draft, EFN; review and editing, NFA, MP; review of final  
300 manuscript, all authors.

301

### 302 **Funding information**

303 MA, MJH, UNI, SG, CO, PET and MP were supported by the Medical Research Council  
304 Unit, The Gambia at London School of Hygiene and Tropical Medicine. EFN and MP were  
305 supported by the BBSRC Institute Strategic Programme Microbes in the Food Chain  
306 BB/R012504/1 and its constituent projects 44414000A and 4408000A. NFA was supported  
307 by the Quadram Institute Bioscience BBSRC funded Core Capability Grant (project number  
308 BB/ CCG1860/1). The funders played no role in the study design, data collection and  
309 analysis, the decision to publish, or the preparation of the manuscript.

310

311 **References**

- 312 1. Blount ZD. The unexhausted potential of *E. coli*. *eLife*. 2015;4.
- 313 2. Good BH, McDonald MJ, Barrick JE, Lenski RE, Desai MM. The dynamics of  
314 molecular evolution over 60,000 generations. *Nature*. 2017;551(7678):45-50.
- 315 3. Camins BC, Marschall J, DeVader SR, Maker DE, Hoffman MW, Fraser VJ. The  
316 clinical impact of fluoroquinolone resistance in patients with *E coli* bacteremia.  
317 *Journal of Hospital Medicine*. 2011;6(6):344-9.
- 318 4. Russo TA, Johnson JR. Medical and economic impact of extraintestinal infections due  
319 to *Escherichia coli*: focus on an increasingly important endemic problem. *Microbes*  
320 and *Infection*. 2003;5(5):449-56.
- 321 5. Rodríguez-Baño J, Picón E, Gijón P, Hernández JR, Cisneros JM, Peña C, et al. Risk  
322 factors and prognosis of nosocomial bloodstream infections caused by extended-  
323 spectrum-beta-lactamase-producing *Escherichia coli*. *Journal of Clinical*  
324 *Microbiology*. 2010;48(5):1726-31.
- 325 6. Hobman JL, Penn CW, Pallen MJ. Laboratory strains of *Escherichia coli*: model  
326 citizens or deceitful delinquents growing old disgracefully? *Molecular Microbiology*.  
327 2007;64(4):881-5.
- 328 7. Rasko DA, Rosovitz MJ, Myers GS, Mongodin EF, Fricke WF, Gajer P, et al. The  
329 pangenome structure of *Escherichia coli*: comparative genomic analysis of *E. coli*  
330 commensal and pathogenic isolates. *Journal of Bacteriology*. 2008;190(20):6881-93.
- 331 8. Touchon M, Hoede C, Tenaillon O, Barbe V, Baeriswyl S, Bidet P, et al. Organised  
332 genome dynamics in the *Escherichia coli* species results in highly diverse adaptive  
333 paths. *PLoS Genetics*. 2009;5(1):e1000344.
- 334 9. Stoesser N, Sheppard AE, Moore CE, Golubchik T, Parry CM, Nget P, et al.  
335 Extensive within-host diversity in fecally carried extended-spectrum-beta-lactamase-

- 336 producing *Escherichia coli* isolates: Implications for transmission analyses. Journal of  
337 Clinical Microbiology. 2015;53(7):2122-31.
- 338 10. Oshima K, Toh H, Ogura Y, Sasamoto H, Morita H, Park SH, et al. Complete genome  
339 sequence and comparative analysis of the wild-type commensal *Escherichia coli*  
340 strain SE11 isolated from a healthy adult. DNA Research. 2008;15(6):375-86.
- 341 11. Ferjani S, Saidani M, Hamzaoui Z, Alonso CA, Torres C, Maamar E, et al.  
342 Community fecal carriage of broad-spectrum cephalosporin-resistant *Escherichia coli*  
343 in Tunisian children. Diagnostic Microbiology and Infectious Disease.  
344 2017;87(2):188-92.
- 345 12. Moremi N, Claus H, Vogel U, Mshana SE. Faecal carriage of CTX-M extended-  
346 spectrum beta-lactamase-producing *Enterobacteriaceae* among street children  
347 dwelling in Mwanza city, Tanzania. PLoS One. 2017;12(9):e0184592.
- 348 13. Ahmed SF, Ali MM, Mohamed ZK, Moussa TA, Klena JD. Fecal carriage of  
349 extended-spectrum  $\beta$ -lactamases and AmpC-producing *Escherichia coli* in a Libyan  
350 community. Annals of Clinical Microbiology and Antimicrobials. 2014;13:22.
- 351 14. Walk ST, Alm EW, Gordon DM, Ram JL, Toranzos GA, Tiedje JM, et al. Cryptic  
352 lineages of the genus *Escherichia*. Applied and Environmental Microbiology.  
353 2009;75(20):6534-44.
- 354 15. Alm EW, Walk ST, Gordon DM. The Niche of *Escherichia coli*. in Population  
355 genetics of bacteria (eds S.T. Walk and P.C.H. Feng). American Society of  
356 Microbiology; 2011.
- 357 16. Escobar-Paramo P, Clermont O, Blanc-Potard AB, Bui H, Le Bouguenec C, Denamur  
358 E. A specific genetic background is required for acquisition and expression of  
359 virulence factors in *Escherichia coli*. Molecular Biology and Evolution.  
360 2004;21(6):1085-94.

- 361 17. Mellata M. Human and avian extraintestinal pathogenic *Escherichia coli*: infections,  
362 zoonotic risks and antibiotic resistance trends. *Foodborne Pathogens and Disease*.  
363 2013;10(11):916-32.
- 364 18. Laxminarayan R, Duse A, Wattal C, Zaidi AK, Wertheim HF, Sumpradit N, et al.  
365 Antibiotic resistance-the need for global solutions. *The Lancet Infectious Diseases*.  
366 2013;13(12):1057-98.
- 367 19. Stoppe NC, Silva JS, Carlos C, Sato MIZ, Saraiva AM, Ottoboni LMM, et al.  
368 Worldwide phylogenetic group patterns of *Escherichia coli* from commensal human  
369 and wastewater treatment plant isolates. *Frontiers in Microbiology*. 2017;8:2512.
- 370 20. Dixit OVA, O'Brien CL, Pavli P, Gordon DM. Within-host evolution versus  
371 immigration as a determinant of *Escherichia coli* diversity in the human  
372 gastrointestinal tract. *Environmental Microbiology*. 2018;20(3):993-1001.
- 373 21. Richter TKS, Hazen TH, Lam D, Coles CL, Seidman JC, You Y, et al. Temporal  
374 variability of *Escherichia coli* diversity in the gastrointestinal tracts of Tanzanian  
375 children with and without exposure to antibiotics. *mSphere*. 2018;3(6).
- 376 22. Chen SL, Wu M, Henderson JP, Hooton TM, Hibbing ME, Hultgren SJ, et al.  
377 Genomic diversity and fitness of *E. coli* strains recovered from the intestinal and  
378 urinary tracts of women with recurrent urinary tract infection. *Science Translational*  
379 *Medicine*. 2013;5(184):184ra60.
- 380 23. Shooter RA, Bettleheim KA, Lennox-King SM, O'Farrell S. *Escherichia coli*  
381 serotypes in the faeces of healthy adults over a period of several months. *Journal of*  
382 *Hygiene (London)*. 1977;78(1):95-8.
- 383 24. Schlager TA, Hendley JO, Bell AL, Whittam TS. Clonal diversity of *Escherichia coli*  
384 colonizing stools and urinary tracts of young girls. *Infection and Immunity*.  
385 2002;70(3):1225-9.



- 386 25. McNally A, Alhashash F, Collins M, Alqasim A, Paszckiewicz K, Weston V, et al.  
387 Genomic analysis of extra-intestinal pathogenic *Escherichia coli* urosepsis. *Clinical*  
388 *Microbiology and Infection*. 2013;19(8):E328-34.
- 389 26. Nielsen KL, Stegger M, Godfrey PA, Feldgarden M, Andersen PS, Frimodt-Møller N.  
390 Adaptation of *Escherichia coli* traversing from the faecal environment to the urinary  
391 tract. *International Journal of Medical Microbiology*. 2016;306(8):595-603.
- 392 27. Stegger M, Leihof RF, Baig S, Sieber RN, Thingholm KR, Marvig RL, et al. A  
393 snapshot of diversity: Intraclonal variation of *Escherichia coli* clones as commensals  
394 and pathogens. *International Journal of Medical Microbiology*. 2020;310(3):151401.
- 395 28. Hartl DL, Dykhuizen DE. The population genetics of *Escherichia coli*. *Annual*  
396 *Reviews of Genetics*. 1984;18:31-68.
- 397 29. Bettelheim KA, Faiers M, Shooter RA. Serotypes of *Escherichia coli* in normal  
398 stools. *The Lancet*. 1972;2(7789):1223-4.
- 399 30. Kotloff KL, Nataro JP, Blackwelder WC, Nasrin D, Farag TH, Panchalingam S, et al.  
400 Burden and aetiology of diarrhoeal disease in infants and young children in  
401 developing countries (the Global Enteric Multicenter Study, GEMS): a prospective,  
402 case-control study. *The Lancet*. 2013;382(9888):209-22.
- 403 31. Liu J, Platts-Mills JA, Juma J, Kabir F, Nkeze J, Okoi C, et al. Use of quantitative  
404 molecular diagnostic methods to identify causes of diarrhoea in children: a reanalysis  
405 of the GEMS case-control study. *The Lancet*. 2016;388(10051):1291-301.
- 406 32. Kotloff KL, Blackwelder WC, Nasrin D, Nataro JP, Farag TH, van Eijk A, et al. The  
407 Global Enteric Multicenter Study (GEMS) of diarrheal disease in infants and young  
408 children in developing countries: epidemiologic and clinical methods of the  
409 case/control study. *Clinical Infectious Diseases*. 2012;55 Suppl 4:S232-45.

- 410 33. Foster-Nyarko E, Nabil-Fareed A, Anuradha R, M. TN, Sheikh J, Anna K-AB, et al.  
411 Genomic diversity of *Escherichia coli* isolates from non-human primates in the  
412 Gambia. bioRxiv. 2020:2020.02.29.971309.
- 413 34. De Silva D, Peters J, Cole K, Cole MJ, Cresswell F, Dean G, et al. Whole-genome  
414 sequencing to determine transmission of *Neisseria gonorrhoeae*: an observational  
415 study. The Lancet Infectious Diseases. 2016;16(11):1295-303.
- 416 35. Connor TR, Loman NJ, Thompson S, Smith A, Southgate J, Poplawski R, et al.  
417 CLIMB (the Cloud Infrastructure for Microbial Bioinformatics): an online resource  
418 for the medical microbiology community. Microbial Genomics. 2016;2(9):e000086..
- 419 36. Stamatakis A. RAxML-VI-HPC: maximum likelihood-based phylogenetic analyses  
420 with thousands of taxa and mixed models. Bioinformatics. 2006;22(21):2688-90.
- 421 37. Zhou Z, Alikhan NF, Mohamed K, Fan Y, Achtman M, Group AS. The EnteroBase  
422 user's guide, with case studies on *Salmonella* transmissions, *Yersinia pestis*  
423 phylogeny, and *Escherichia coli* core genomic diversity. Genome Research.  
424 2020;30(1):138-52.
- 425 38. Clermont O, Christenson JK, Denamur E, Gordon DM. The Clermont *Escherichia*  
426 *coli* phylo-typing method revisited: improvement of specificity and detection of new  
427 phylo-groups. Environmental Microbiology Reports. 2013;5(1):58-65.
- 428 39. Clermont O, Gordon D, Denamur E. Guide to the various phylogenetic classification  
429 schemes for *Escherichia coli* and the correspondence among schemes. Microbiology.  
430 2015;161(Pt 5):980-8.
- 431 40. Bankevich A, Nurk S, Antipov D, Gurevich AA, Dvorkin M, Kulikov AS, et al.  
432 SPAdes: a new genome assembly algorithm and its applications to single-cell  
433 sequencing. Journal of Computational Biology. 2012;19(5):455-77.

- 434 41. Wheeler TJ. Large-Scale Neighbor-Joining with NINJA. in Algorithms in  
435 Bioinformatics. Berlin, Heidelberg: Springer Berlin Heidelberg. 2009.
- 436 42. Degener JE, Smit AC, Michel MF, Valkenburg HA, Muller L. Faecal carriage of  
437 aerobic gram-negative bacilli and drug resistance of *Escherichia coli* in different age-  
438 groups in Dutch urban communities. Journal of Medical Microbiology.  
439 1983;16(2):139-45.
- 440 43. Lidin-Janson G, Kaijser B, Lincoln K, Olling S, Wedel H. The homogeneity of the  
441 faecal coliform flora of normal school-girls, characterized by serological and  
442 biochemical properties. Medical Microbiology and Immunology. 1978;164(4):247-53.
- 443 44. Escobar-Páramo P, Grenet K, Le Menac'h A, Rode L, Salgado E, Amorin C, et al.  
444 Large-scale population structure of human commensal *Escherichia coli* isolates.  
445 Applied and Environmental Microbiology. 2004;70(9):5698-700.
- 446 45. Duriez P, Clermont O, Bonacorsi S, Bingen E, Chaventré A, Elion J, et al.  
447 Commensal *Escherichia coli* isolates are phylogenetically distributed among  
448 geographically distinct human populations. Microbiology. 2001;147(Pt 6):1671-6.
- 449 46. Wold AE, Caugant DA, Lidin-Janson G, de Man P, Svanborg C. Commensal colonic  
450 *Escherichia coli* strains frequently display uropathogenic characteristics. Journal of  
451 Infectious Diseases. 1992;165(1):46-52.
- 452 47. Tenaillon O, Skurnik D, Picard B, Denamur E. The population genetics of commensal  
453 *Escherichia coli*. Nature Reviews Microbiology. 2010;8(3):207-17.
- 454 48. Reeves PR, Liu B, Zhou Z, Li D, Guo D, Ren Y, et al. Rates of mutation and host  
455 transmission for an *Escherichia coli* clone over 3 years. PloS One.  
456 2011;6(10):e26907.
- 457 50. Doyle RM, O'Sullivan DM, Aller SD, Bruchmann S, Clark T, Coello Pelegrin A, et  
458 al. Discordant bioinformatic predictions of antimicrobial resistance from whole-

- 459 genome sequencing data of bacterial isolates: an inter-laboratory study. *Microbial*  
460 *Genomics*. 2020;6(2).
- 461 51. Dione MM, Ikumapayi UN, Saha D, Mohammed NI, Geerts S, Ieven M, et al. Clonal  
462 differences between Non-Typhoidal *Salmonella* (NTS) recovered from children and  
463 animals living in close contact in the Gambia. *PLoS Neglected Tropical Diseases*.  
464 2011;5(5):e1148.
- 465
- 466

467 **Tables and figure legends**

468

Table 1: Characteristics of the study population

| Sample ID | Lab ID | Age (months) | Gender | Bristol stool index | Domestic animal within household              | Enrolment date |
|-----------|--------|--------------|--------|---------------------|-----------------------------------------------|----------------|
| 102135    | H1     | 43           | Female | Thick liquid        | Goat, sheep                                   | 18-Feb-09      |
| 102650    | H2     | 45           | Female | Soft                | Goat, sheep, donkey                           | 27-Jul-09      |
| 103296    | H3     | 44           | Male   | Soft                | Goat, horse, donkey, rodent                   | 27-Apr-10      |
| 103298    | H4     | 44           | Male   | Formed              | Sheep, fowl, horse, donkey, rodent            | 27-Apr-10      |
| 103621    | H5     | 37           | Female | Soft                | Sheep, fowl, rodent                           | 01-Sep-10      |
| 103650    | H6     | 48           | Female | Soft                | Fowl, donkey, rodent                          | 29-Sep-10      |
| 103649    | H7     | 45           | Female | Soft                | Goat, sheep, fowl, horse, rodent              | 29-Sep-10      |
| 103071    | H8     | 53           | Male   | Formed              | Goat, sheep, fowl                             | 15-Jan-10      |
| 103622    | H9     | 39           | Female | Soft                | Goat, sheep                                   | 01-Sep-10      |
| 100167    | H10    | 40           | Female | Soft                | Goat, sheep, fowl                             | 01-Feb-08      |
| 100217    | H11    | 57           | Male   | Formed              | Cat, fowl, horse, rodent                      | 21-Feb-08      |
| 100230    | H12    | 51           | Male   | Soft                | Goat, sheep, cat, fowl, rodent                | 28-Feb-08      |
| 100612    | H13    | 55           | Female | Formed              | Goat, sheep, dog, fowl, horse, donkey, rodent | 16-Aug-08      |
| 100162    | H14    | 47           | Female | Thick liquid        | Sheep, horse, donkey, rodent                  | 30-Jan-08      |
| 102255    | H15    | 42           | Male   | Formed              | Goat, sheep, fowl, horse, donkey, rodent      | 26-Mar-09      |
| 102250    | H16    | 39           | Male   | Formed              | Fowl                                          | 25-Mar-09      |
| 102114    | H17    | 54           | Male   | Formed              | Rodent                                        | 12-Feb-09      |
| 102123    | H18    | 37           | Female | Soft                | Goat, sheep, fowl, rodent                     | 14-Feb-09      |
| 103282    | H19    | 43           | Male   | Formed              | Goat, sheep, dog, cat, cow, fowl,             | 22-Apr-10      |
| 100817    | H20    | 44           | Male   | Soft                | Dog, fowl                                     | 03-Dec-08      |
| 100816    | H21    | 40           | Male   | Soft                | Goat, sheep, cow, fowl, horse, donkey, rodent | 03-Dec-08      |
| 102836    | H22    | 47           | Male   | Thick liquid        | Fowl, rodent                                  | 12-Oct-09      |
| 102837    | H23    | 41           | Male   | Thick liquid        | Sheep, fowl, rodent                           | 12-Oct-09      |
| 102843    | H24    | 44           | Male   | Soft                | Fowl, rodent                                  | 13-Oct-09      |
| 102907    | H25    | 36           | Male   | Soft                | Goat, sheep, fowl                             | 05-Nov-09      |
| 102905    | H26    | 37           | Male   | Soft                | Goat, sheep, fowl                             | 05-Nov-09      |
| 102262    | H27    | 38           | Male   | Formed              | Goat, sheep, rodent                           | 01-Apr-09      |
| 102728    | H28    | 41           | Male   | Soft                | Goat, fowl                                    | 24-Aug-09      |
| 102729    | H29    | 41           | Male   | Soft                | Goat, dog, cat, fowl, donkey                  | 24-Aug-09      |
| 100806    | H30    | 55           | Male   | Soft                | Goat, sheep, dog, fowl                        | 21-Nov-08      |
| 102053    | H31    | 37           | Female | Formed              | Cow, fowl, donkey, rodent                     | 29-Jan-09      |
| 102052    | H32    | 38           | Female | Formed              | Goat, sheep, cow, fowl, donkey, rodent        | 29-Jan-09      |
| 102511    | H33    | 37           | Male   | Soft                | Fowl, horse, donkey, rodent                   | 19-Jun-09      |

|        |     |    |        |               |                                                   |           |
|--------|-----|----|--------|---------------|---------------------------------------------------|-----------|
| 102649 | H34 | 37 | Male   | Soft          | Fowl, horse, donkey, rodent                       | 27-Jul-09 |
| 102454 | H35 | 52 | Male   | Soft          | Sheep, fowl, donkey, rodent                       | 02-Jun-09 |
| 102459 | H36 | 51 | Male   | Formed        | Goat, sheep, dog, cat, cow, horse, donkey, rodent | 04-Jun-09 |
| 100303 | H37 | 58 | Male   | Formed        | Sheep, fowl                                       | 08-Apr-08 |
| 100320 | H38 | 42 | Female | Formed        | Sheep, fowl, rodent                               | 19-Apr-08 |
| 100319 | H39 | 45 | Female | Formed        | Goat, sheep, fowl, rodent                         | 17-Apr-08 |
| 103081 | H40 | 39 | Female | Thick liquid  | Goat, sheep, fowl, horse, donkey, rodent          | 20-Jan-10 |
| 103082 | H41 | 39 | Female | Thick liquid  | Goat, sheep, fowl, horse, donkey, rodent          | 20-Jan-10 |
| 100663 | H42 | 36 | Male   | Thick liquid  | Goat, sheep, fowl, donkey                         | 10-Sep-08 |
| 100072 | H43 | 51 | Female | Formed        | Goat, cow, fowl, rodent                           | 03-Jan-08 |
| 103171 | H44 | 36 | Female | Soft          | Goat, sheep, rodent, fowl, rodent                 | 18-Feb-10 |
| 103172 | H45 | 36 | Female | Soft          | Goat, sheep, fowl, rodent                         | 18-Feb-10 |
| 103292 | H46 | 39 | Male   | Soft          | Goat, sheep, fowl                                 | 23-Apr-10 |
| 102952 | H47 | 36 | Male   | Soft          | Goat, sheep, fowl, rodent                         | 20-Nov-09 |
| 102953 | H48 | 37 | Male   | Soft          | Goat, sheep, fowl, rodent                         | 20-Nov-09 |
| 102964 | H49 | 40 | Female | Formed        | Goat, fowl, rodent                                | 26-Nov-09 |
| 102966 | H50 | 37 | Female | Formed        | Goat, sheep, fowl, horse, donkey, rodent          | 22-Apr-10 |
| 103281 | H51 | 44 | Male   | Formed        | Goat, sheep, dog, cat, fowl                       | 22-Apr-10 |
| 100540 | H52 | 43 | Male   | Soft          | Goat, sheep, fowl, rodent                         | 22-Jul-08 |
| 103123 | H53 | 38 | Male   | Soft          | Sheep                                             | 03-Feb-10 |
| 103124 | H54 | 36 | Male   | Soft          | Fowl                                              | 03-Feb-10 |
| 102089 | H55 | 38 | Female | Soft          | Goat, cow, fowl, horse, donkey, rodent            | 05-Feb-09 |
| 103297 | H56 | 38 | Male   | Soft          | Goat, sheep, fowl, horse, donkey, rodent          | 27-Apr-10 |
| 102251 | H57 | 39 | Male   | Formed        | Fowl                                              | 25-Mar-09 |
| 103602 | H58 | 38 | Female | Formed        | Goat, sheep, cow, fowl                            | 26-Aug-10 |
| 103600 | H59 | 39 | Female | Formed        | Goat, sheep, fowl                                 | 26-Aug-10 |
| 100026 | H60 | 49 | Female | Soft          | Goat, sheep, cow, fowl                            | 14-Dec-07 |
| 102102 | H61 | 47 | Female | Opaque watery | None                                              | 11-Feb-09 |
| 102263 | H62 | 38 | Male   | Formed        | Horse, donkey, rodent                             | 01-Apr-09 |
| 103070 | H63 | 58 | Male   | Soft          | Goat, sheep, fowl                                 | 15-Jan-10 |
| 103130 | H64 | 40 | Male   | Soft          | Sheep, fowl                                       | 03-Feb-10 |
| 102051 | H65 | 36 | Female | Formed        | Goat, sheep, dog, cat, cow, fowl, donkey, rodent  | 29-Jan-09 |
| 102524 | H66 | 36 | Male   | Soft          | Goat, sheep, fowl, horse, donkey, rodent          | 24-Jun-09 |

Table 2: Phylogroup and sequence types of the distinct clones isolated in each patient

| Host | Genotype number |               |               |               |               | Number of distinct genotypes (clones) | Migration events | Within-host evolution events |
|------|-----------------|---------------|---------------|---------------|---------------|---------------------------------------|------------------|------------------------------|
|      | 1               | 2             | 3             | 4             | 5             |                                       |                  |                              |
| H-2  | A (9274)        | A (9274)      | A (9274)      | A (9274)      | A (9274)      | 1                                     | 1                | 0                            |
| H-9  | A (2705)        | A (2705)      | A (2705)      | D (2914)      | B1 (29)       | 3                                     | 3                | 0                            |
| H-15 | B2 (9277)       | B2 (9277)     | B2 (9277)     | Clade I (747) | Clade I (747) | 3                                     | 2                | 1                            |
| H-18 | D (38)          | D (38)        | B1 (9281)     | A (9274)      |               | 4                                     | 3                | 1                            |
| H-21 | B1 (58)         | B1 (58)       | B1 (223)      | A (540)       | D (1204)      | 4                                     | 4                | 0                            |
| H-22 | B1 (316)        | B1 (316)      | B1 (316)      | B1 (316)      |               | 2                                     | 1                | 1                            |
| H-25 | A (181)         | A (181)       | A (181)       | A (181)       | B1 (337)      | 4                                     | 2                | 2                            |
| H-26 | B1 (641)        | B1 (2741)     | A (10)        | A (398)       |               | 4                                     | 4                | 0                            |
| H-28 | B1 (469)        | B1 (469)      | B1 (469)      | B1 (469)      |               | 2                                     | 1                | 1                            |
| H-32 | B1 (101)        | B1 (101)      | B1 (101)      | B1 (2175)     | A (10)        | 3                                     | 3                | 0                            |
| H-34 | B1 (603)        | B1 (603)      | B1 (603)      | B1 (1727)     | A (10)        | 4                                     | 3                | 1                            |
| H-35 | A (226)         |               |               |               |               | 1                                     | 1                | 0                            |
| H-36 | F (59)          | F (59)        | F (59)        | F (59)        | E (9278)      | 3                                     | 2                | 1                            |
| H-37 | D (5148)        | D (5148)      | D (5148)      | D (5148)      | D (5148)      | 3                                     | 1                | 2                            |
| H-38 | D (394)         | D (394)       | D (394)       | D (394)       | B1 (58)       | 4                                     | 2                | 2                            |
| H-39 | B2 (452)        | B2 (452)      | B2 (452)      | B2 (452)      | B2 (452)      | 2                                     | 1                | 1                            |
| H-40 | B1 (155)        |               |               |               |               | 1                                     | 1                | 0                            |
| H-41 | A (43)          | A (43)        | A (43)        | A (43)        | B1 (9283)     | 2                                     | 2                | 0                            |
| H-48 | Clade I (485)   | Clade I (485) | Clade I (485) | Clade I (485) |               | 1                                     | 1                | 0                            |
| H-50 | C (410)         | C (410)       | C (410)       | C (410)       | B1 (515)      | 2                                     | 2                | 0                            |
| H-55 | A (9279)        |               |               |               |               | 1                                     | 1                | 0                            |



Table 3: Pairwise SNP distances between variants arising from within-host evolution

| <i>Host</i> | Sequence type (ST) | Colonies per ST | Pairwise SNP distances between multiple colonies of the same ST |
|-------------|--------------------|-----------------|-----------------------------------------------------------------|
| <i>H2</i>   | 9274               | 5               | 0-9                                                             |
| <i>H9</i>   | 2705               | 3               | 0-1                                                             |
| <i>H15</i>  | 9277               | 3               | 0-1                                                             |
| <i>H15</i>  | 747                | 2               | 3                                                               |
| <i>H18</i>  | 38                 | 2               | 3                                                               |
| <i>H21</i>  | 58                 | 2               | 0                                                               |
| <i>H22</i>  | 316                | 4               | 0-3                                                             |
| <i>H25</i>  | 181                | 4               | 1-5                                                             |
| <i>H28</i>  | 469                | 4               | 0-3                                                             |
| <i>H32</i>  | 101                | 3               | 1-9                                                             |
| <i>H34</i>  | 603                | 3               | 2-8                                                             |
| <i>H36</i>  | 59                 | 4               | 0-14                                                            |
| <i>H37</i>  | 5148               | 5               | 2-18                                                            |
| <i>H38</i>  | 394                | 4               | 1-3                                                             |
| <i>H39</i>  | 452                | 5               | 0-2                                                             |
| <i>H41</i>  | 43                 | 4               | 0-1                                                             |
| <i>H48</i>  | 485                | 4               | 1-9                                                             |
| <i>H50</i>  | 410                | 4               | 0                                                               |

Table 4: Closest relatives to the study isolates

| Sample ID | 7-gene ST | Neighbour host | Neighbour status                 | Neighbour's country of isolation | Allelic distance |
|-----------|-----------|----------------|----------------------------------|----------------------------------|------------------|
| H-32_5    | 10        | Human          | Unknown                          | UK                               | 18               |
| H-36_1    | 59        | Human          | Unknown                          | UK                               | 18               |
| H-39_1    | 452       | Human          | Commensal                        | UK                               | 26               |
| H-9_1     | 2705      | Livestock      |                                  | China                            | 29               |
| H-18_3    | 9274      | Human          | Commensal                        | Unknown                          | 34               |
| H-2_1     | 9274      | Human          | Commensal                        | Unknown                          | 34               |
| H-22_1    | 316       | Human          | Commensal                        | UK                               | 35               |
| H-38_1    | 394       | Human          | Pathogen (cystitis)              | US                               | 39               |
| H-25_4    | 337       | Human          | Unknown                          | Mali                             | 43               |
| H-37_1    | 5148      | Human          | Pathogen (diarrhoea)             | Ecuador                          | 43               |
| H-26_1    | 641       | Livestock      |                                  | US                               | 46               |
| H-26_5    | 398       | Poultry        |                                  | Kenya                            | 47               |
| H-48_2    | 485       | Human          | Commensal                        | Tanzania                         | 57               |
| H-15_1    | 9277      | Human          | Commensal                        | Zambia                           | 68               |
| H-15_2    | 747       | Human          | Commensal                        | Egypt                            | 72               |
| H-28_1    | 469       | Human          | Commensal                        | Kenya                            | 77               |
| H-21_2    | 1204      | Avian          |                                  | Kenya                            | 81               |
| H-34_2    | 10        | Livestock      |                                  | UK                               | 83               |
| H-38_2    | 58        | Human          | Pathogen (bloodstream infection) | Australia                        | 87               |
| H-34_4    | 1727      | Unknown        | Unknown                          | Unknown                          | 89               |
| H-35_1    | 226       | Human          | Commensal                        | China                            | 93               |
| H-21_1    | 58        | Unknown        | Unknown                          | Unknown                          | 98               |
| H-21_4    | 540       | Human          | Unknown                          | Belgium                          | 100              |
| H-32_2    | 2175      | Livestock      |                                  | UK                               | 100              |
| H-26_2    | 10        | Livestock      |                                  | US                               | 111              |
| H-32_1    | 101       | Unknown        | Unknown                          | Unknown                          | 111              |
| H-50_2    | 515       | Environment    |                                  | Canada                           | 117              |
| H-41_1    | 43        | Unknown        | Unknown                          | Unknown                          | 120              |
| H-26_4    | 2741      | Human          | Commensal                        | Germany                          | 126              |
| H-50_1    | 410       | Livestock      |                                  | US                               | 140              |
| H-18_1    | 38        | Poultry        |                                  | US                               | 144              |
| H-21_5    | 223       | Unknown        | Unknown                          | Unknown                          | 145              |
| H-40_1    | 155       | Unknown        | Unknown                          | US                               | 146              |
| H-41_2    | 9283      | Environment    | Commensal                        | US                               | 191              |
| H-36_4    | 9278      | Avian          |                                  | Kenya                            | 208              |
| H-9_3     | 2914      | Canine         |                                  | UK                               | 272              |
| H-9_5     | 29        | Unknown        | Unknown                          | Unknown                          | 288              |
| H-34_1    | 603       | Laboratory     |                                  | UK                               | 325              |
| H-55_1    | 9279      | Environment    |                                  | Unknown                          | 333              |
| H-18_2    | 9281      | Unknown        | Unknown                          | France                           | 430              |
| H-25_1    | 181       | Human          | Commensal                        | Tanzania                         | 607              |

## **Legends to figures**

## Figure 2

A maximum-likelihood tree depicting the phylogenetic relationships among the study isolates. The tree was reconstructed with RAxML, using a general time-reversible nucleotide substitution model and 1,000 bootstrap replicates. The genome assembly of *E. coli* str. K12 substr. MG1655 was used as the reference, and the tree rooted using the genomic assembly of *E. fergusonii* as an outgroup. The sample names are indicated at the tip, with the respective Achtman sequence types (ST) indicated beside the sample names. The respective phylogroups the isolates belong to are indicated with colour codes as displayed in the legend. *E. coli* reference genome is denoted in black. Asterisks (\*) are used to indicate novel STs. The predicted antimicrobial resistance genes and putative virulence factors for each isolate are displayed next to the tree, with the virulence genes clustered according to their function. Multiple copies of the same strain (ST) isolated from a single host are not shown. Instead, we have shown only one representative isolate from each strain. Virulence and resistance factors were not detected in the reference strain either. We have provided a summary of the identified virulence factors and their known functions in Supplementary File 3.

## Figure 3

A: The prevalence of antimicrobial-associated genes detected in the isolates. The y-axis shows the detected AMR-associated genes in the genomes, grouped by antimicrobial class.

B: A histogram depicting the number of antimicrobial classes to which resistance genes were detected in the corresponding strains.

## Figure 4

A: Plasmid replicons detected in the study isolates. B: A histogram depicting the number of plasmids co-harboured in a single strain.

## Figure 5

A: A NINJA neighbour-joining tree showing the population structure of *E. coli* ST38, drawn using the genomes found in the core-genome MLST hierarchical cluster at HC1100, which corresponds to ST38 clonal complex. B: The closest neighbour to a pathogenic strain reported in GEMS<sup>4</sup> is shown to be a commensal isolate recovered from a healthy individual. C: The closest relatives to the commensal ST38 strain recovered from this study is shown (red highlights), with the number of core-genome MLST alleles separating the two genomes displayed. D: A maximum-likelihood phylogenetic tree reconstructed using the genomes found in the cluster in C above, comprising both pathogenic and commensal ST38 strains is presented, depicting the genetic relationship between strain 100415 (pathogenic) and 103709 (commensal) (red highlights). The nodes are coloured to depict the status of the strains as pathogenic (red) or commensal (blue). The geographical locations where isolates were recovered are displayed in Figures 4A-C; the genome counts shown in square brackets.

## Supplementary material

### Supplementary Figure 1

A co-occurrence matrix of acquired antimicrobial resistance genes detected in the study isolates. The diagonal values show how many isolates each individual gene was found in, while the intersections between the columns represent the number of isolates in which the corresponding antimicrobial resistance genes co-occurred.

### Supplementary Figure 2

A Neighbour-joining phylogenetic tree depicting the genetic relationships among twenty-four strains isolated from diarrhoeal cases in the GEMS study<sup>4</sup>. The Sequence types identified in

these isolates are shown in the legend, with the genome count displayed in square brackets next to the respective sequence types. Three STs (ST38, ST58 and ST10) overlapped with what was found among commensal strains from this study (see Figure 2).

### **Supplementary File 1**

Sequencing statistics and characteristics of twenty-four previously sequenced GEMS cases included in this study.

### **Supplementary File 2**

A summary of the sequencing statistics of the study isolates reported in this study.

### **Supplementary File 3**

A summary of the virulence factors detected among the study isolates and their known functions.

### **Supplementary File 4**

A pairwise single nucleotide polymorphism matrix showing the SNP distances between the study genomes.

### **Supplementary File 5**

Two independent cultures of the same clone of samples that were sequenced twice and used to find the SNPs between same clones.

### **Supplementary File 6**

Mutations in variants inferred to have been derived from within-host evolution.

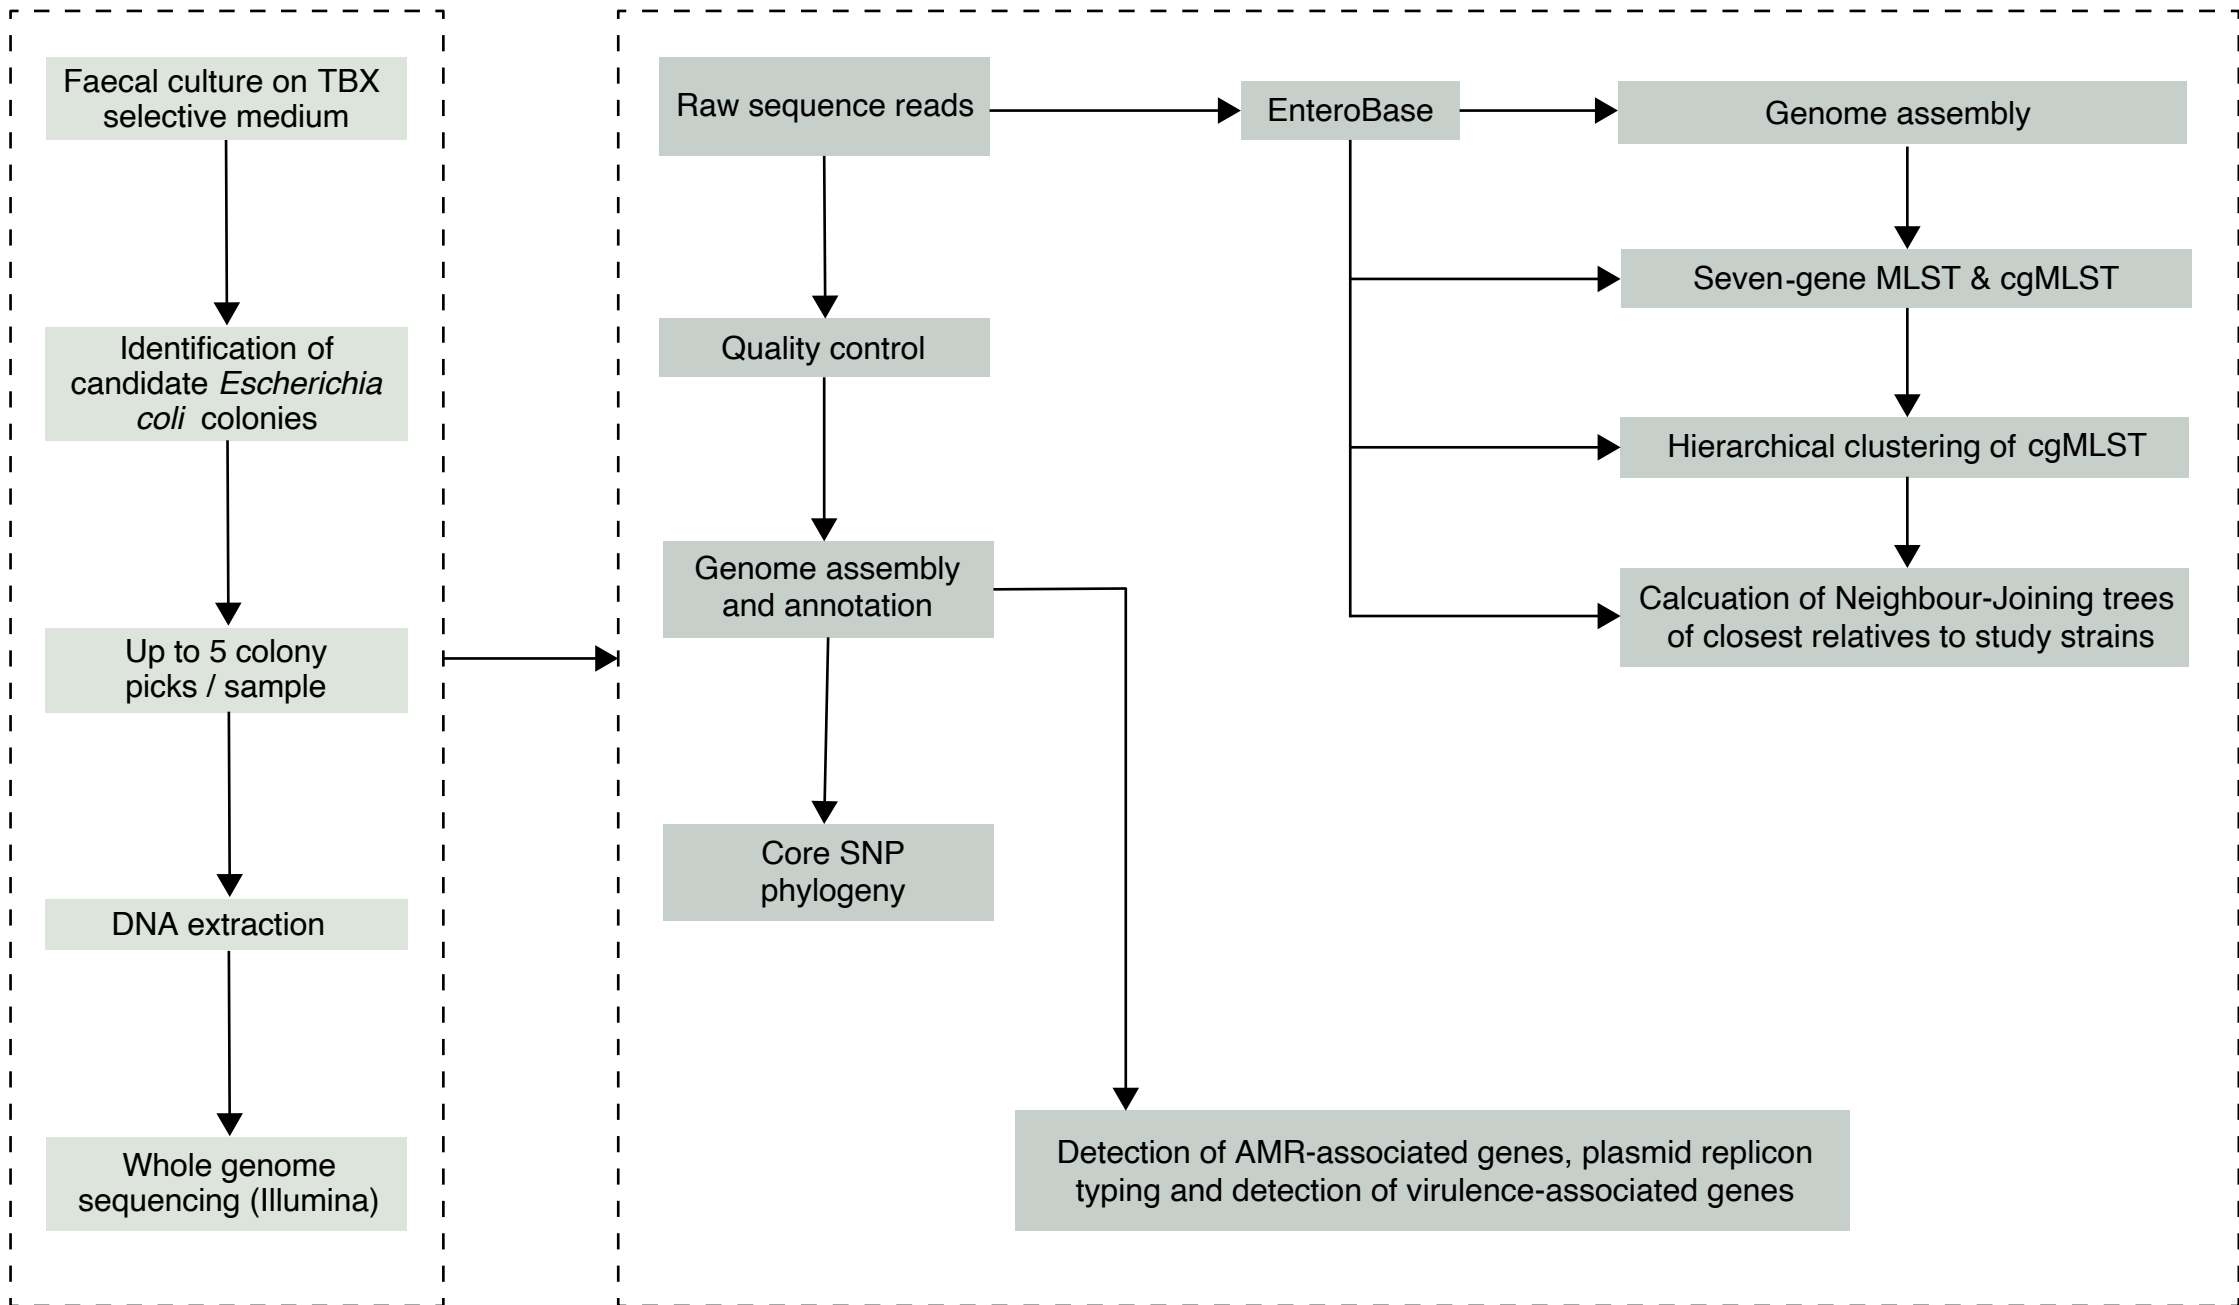

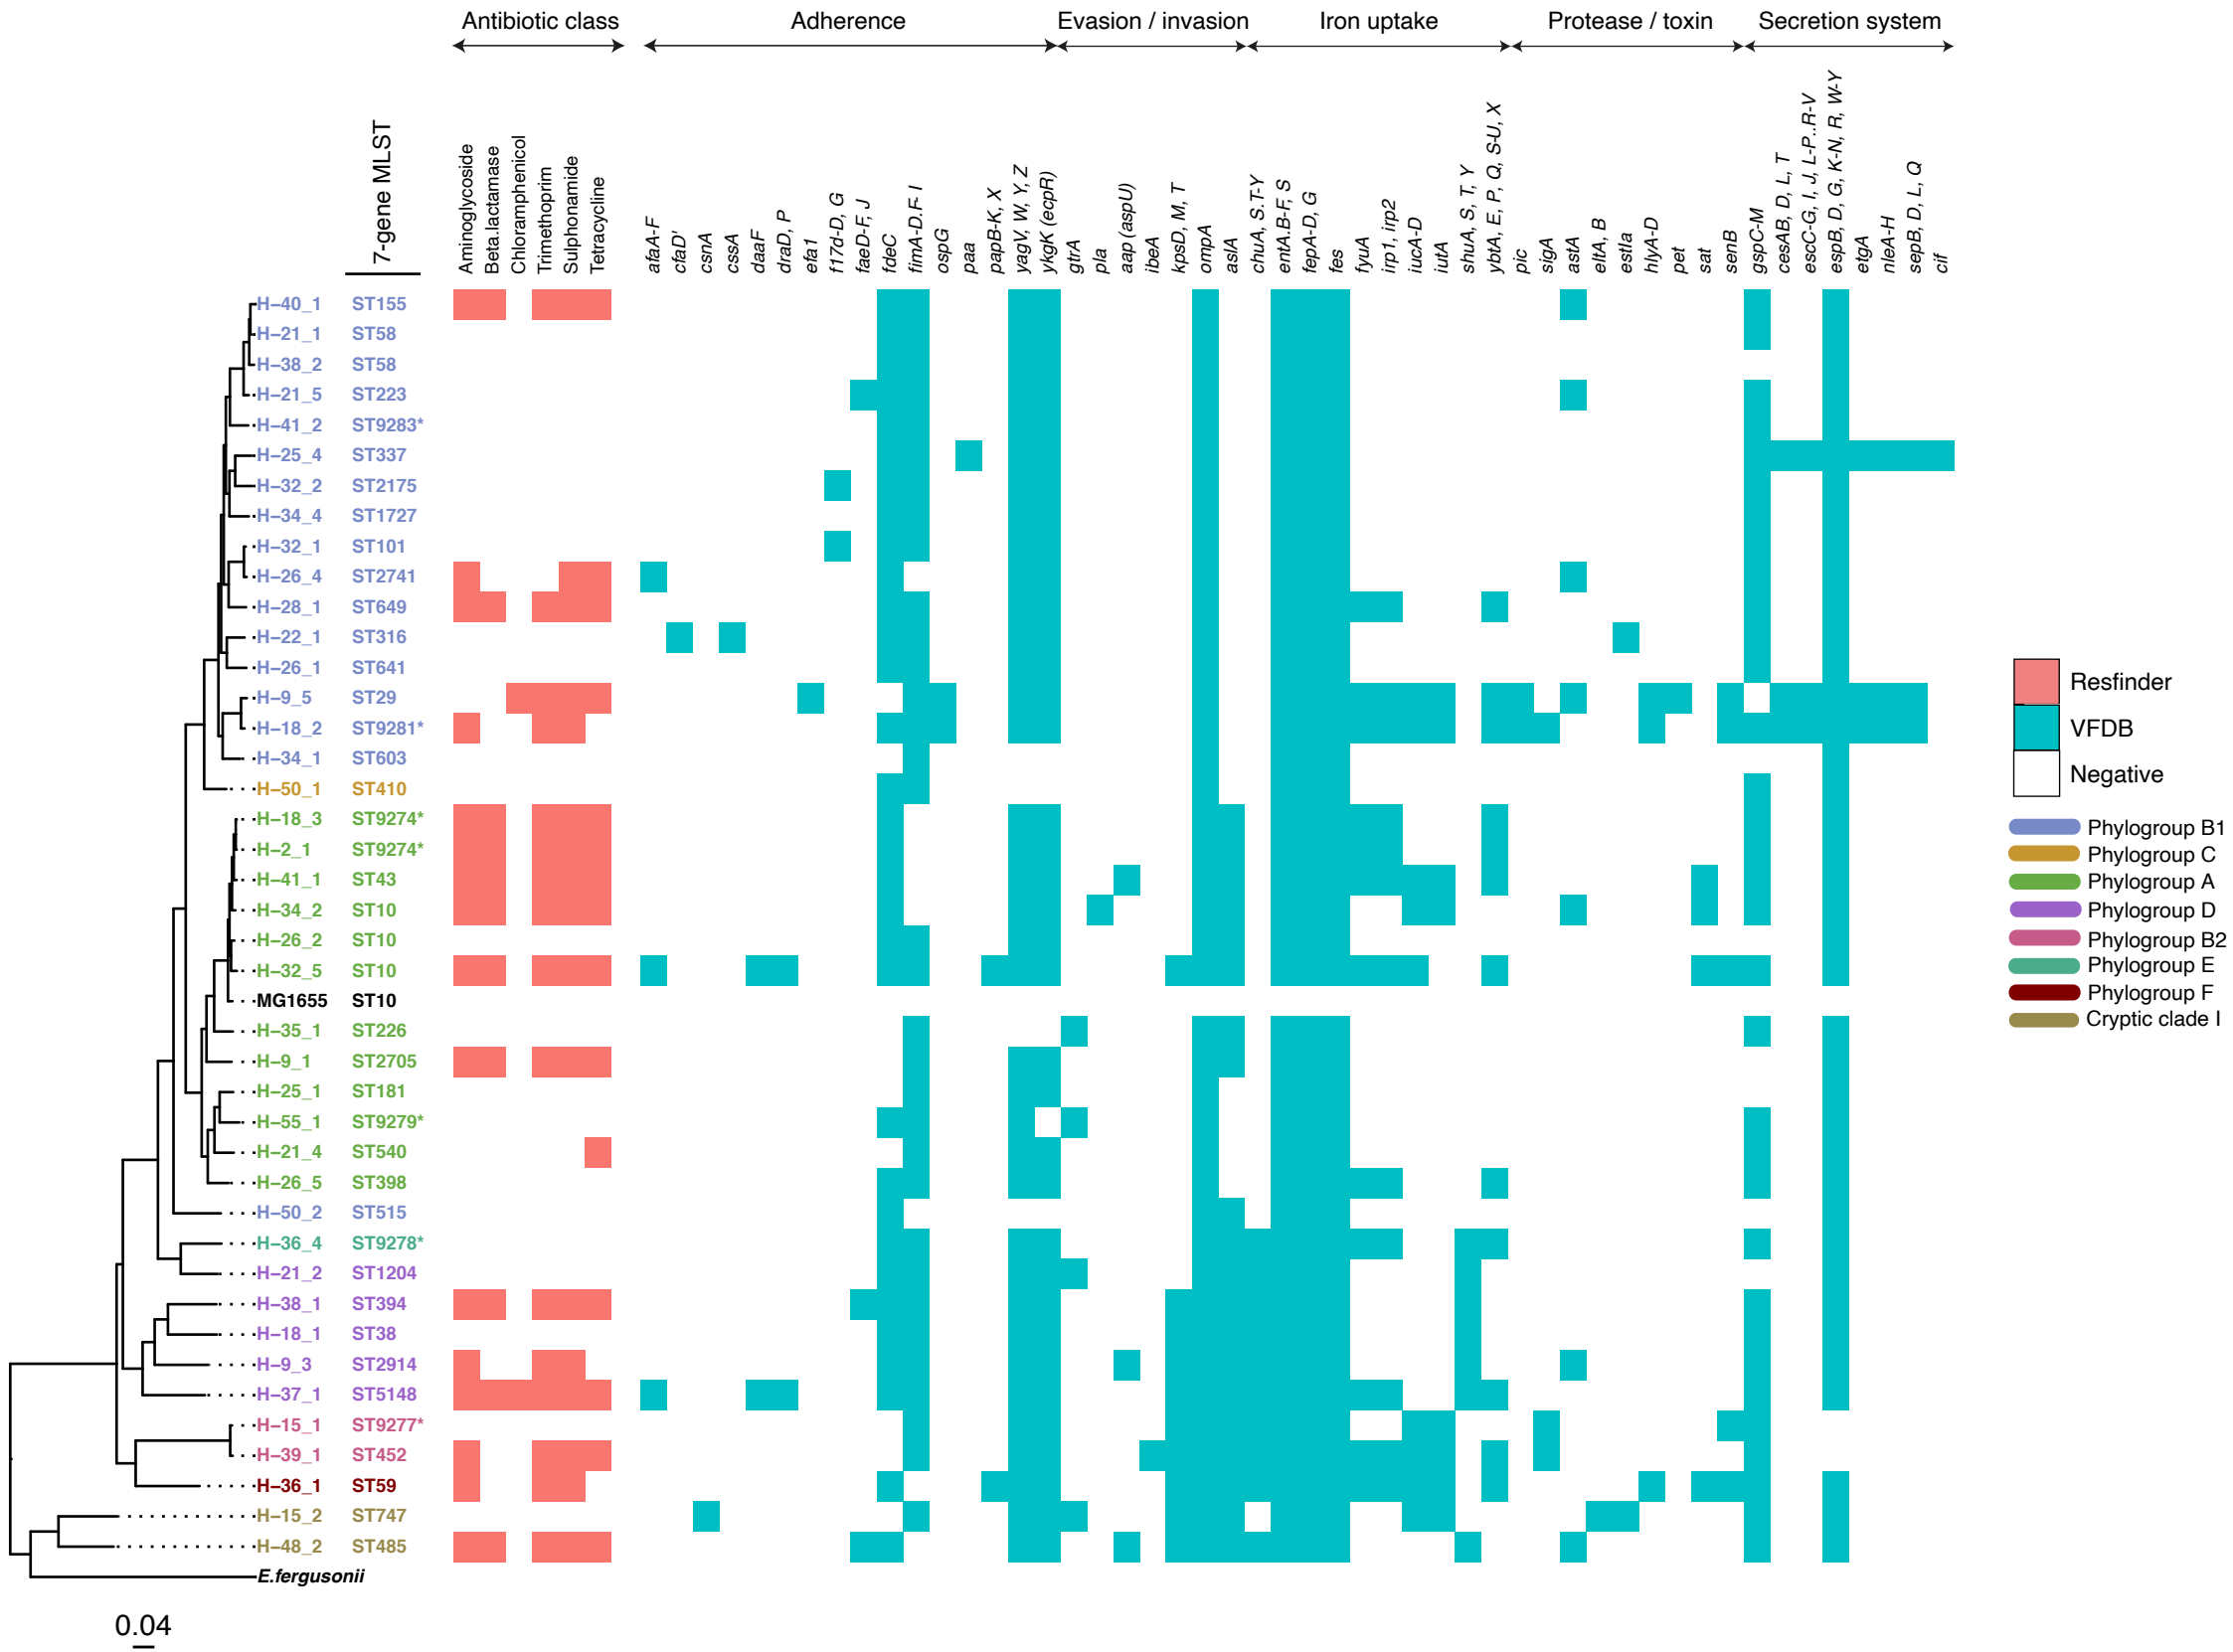



**A**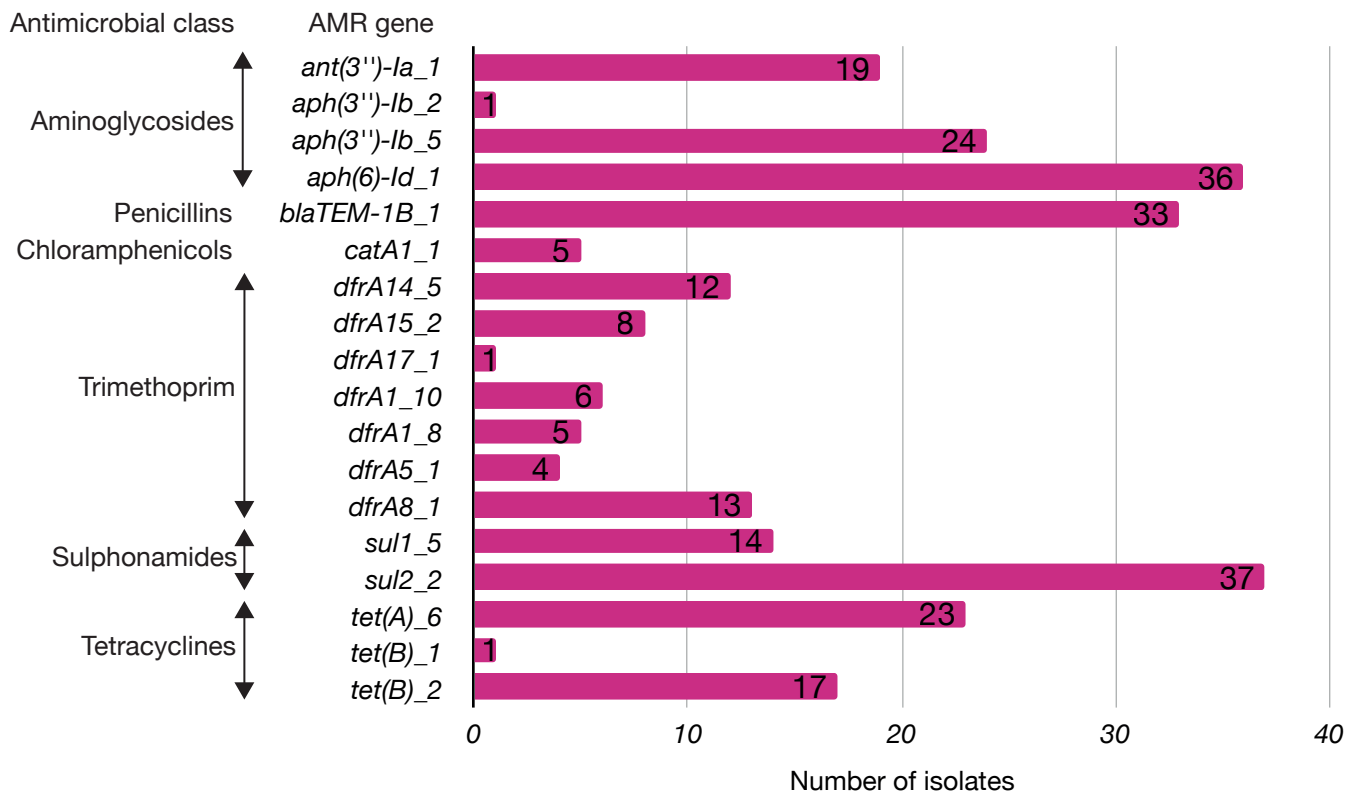**B**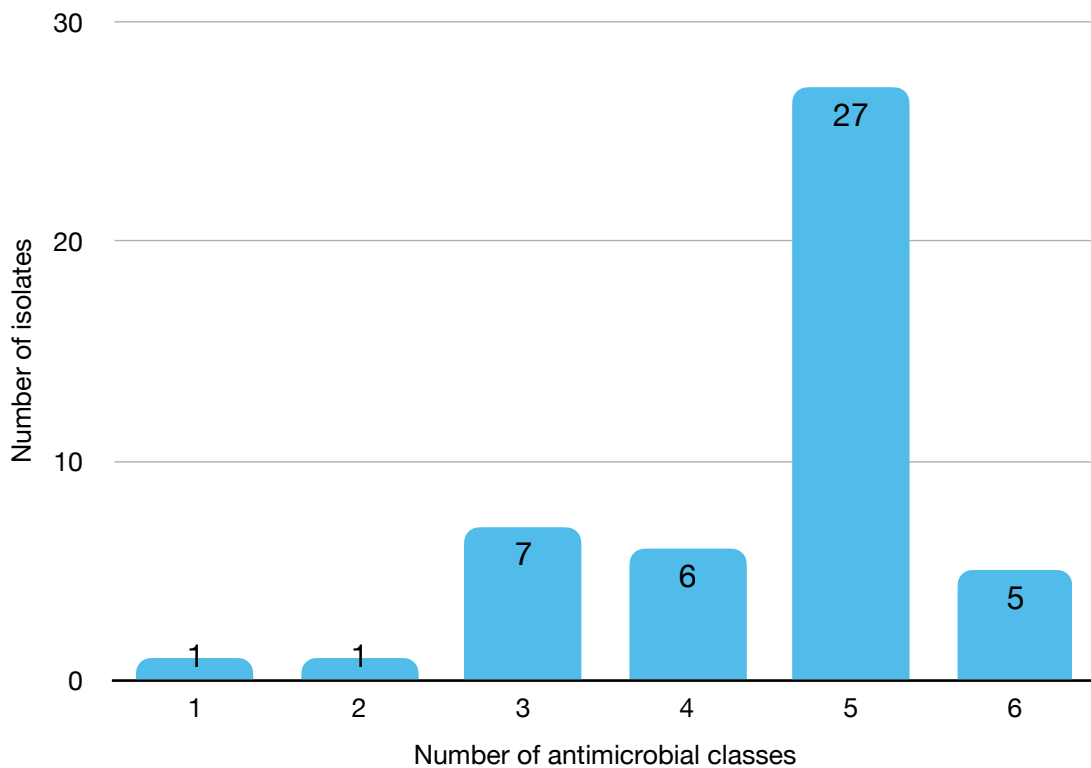

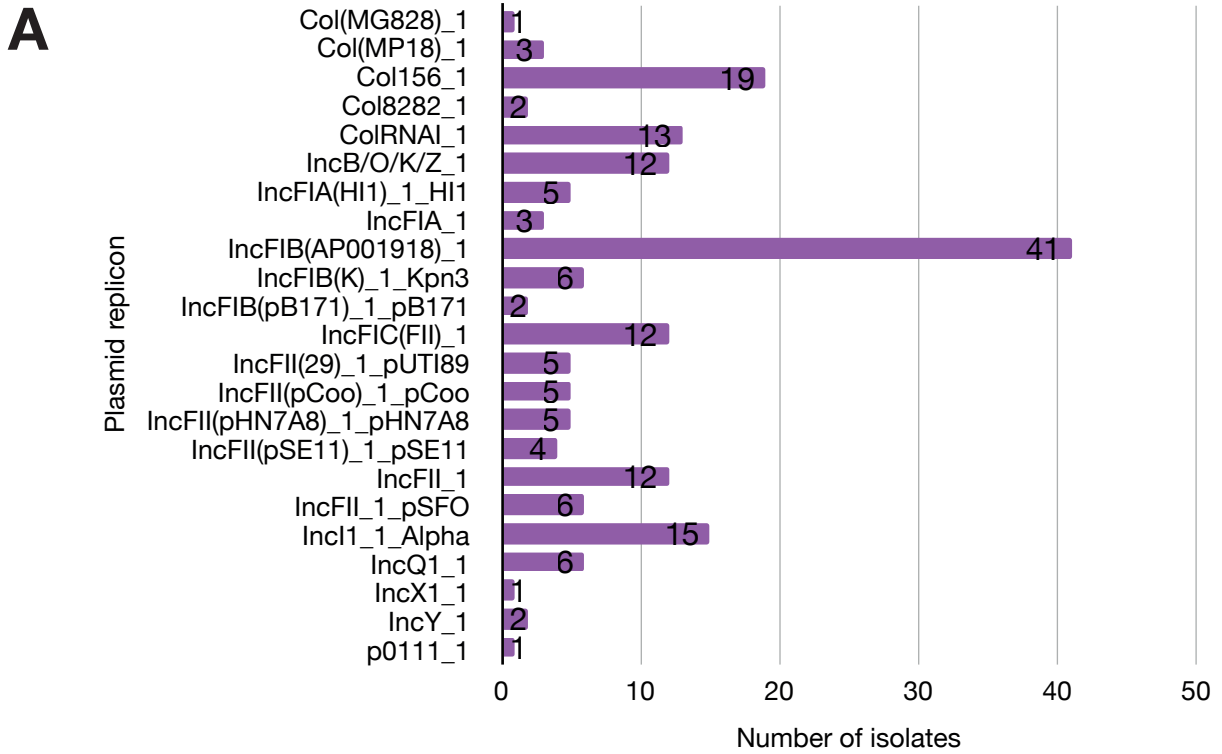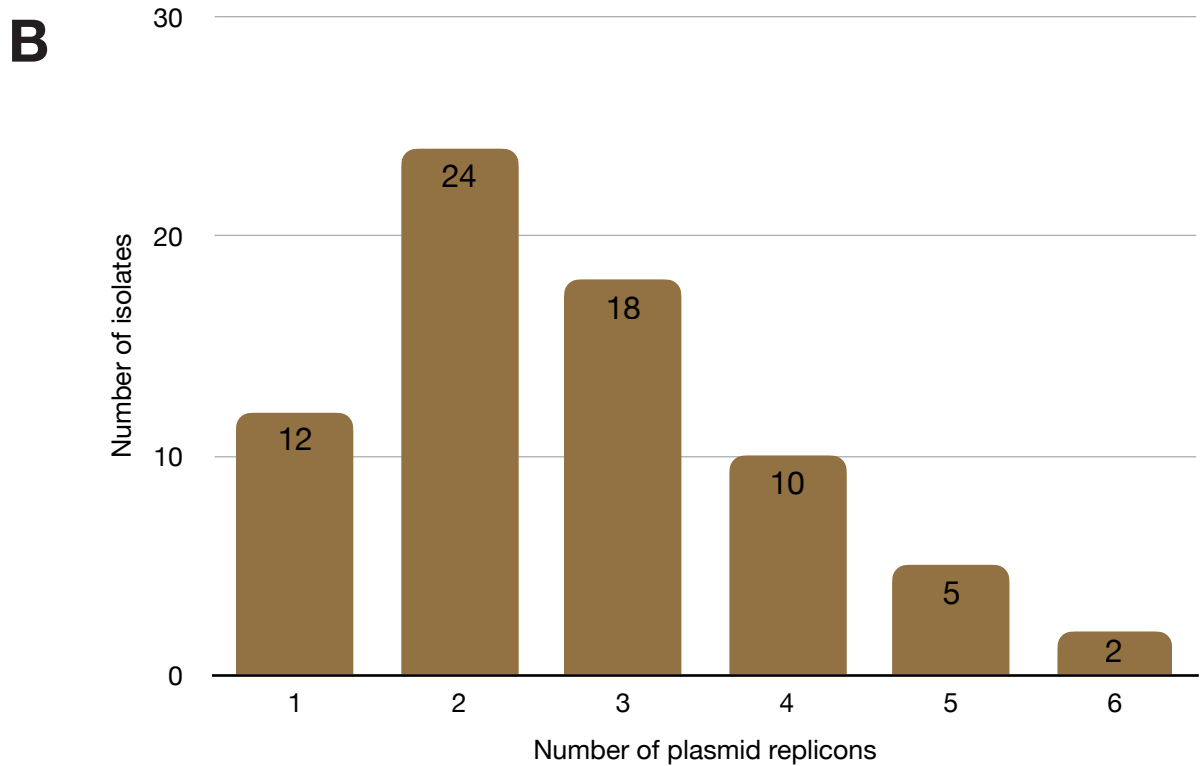

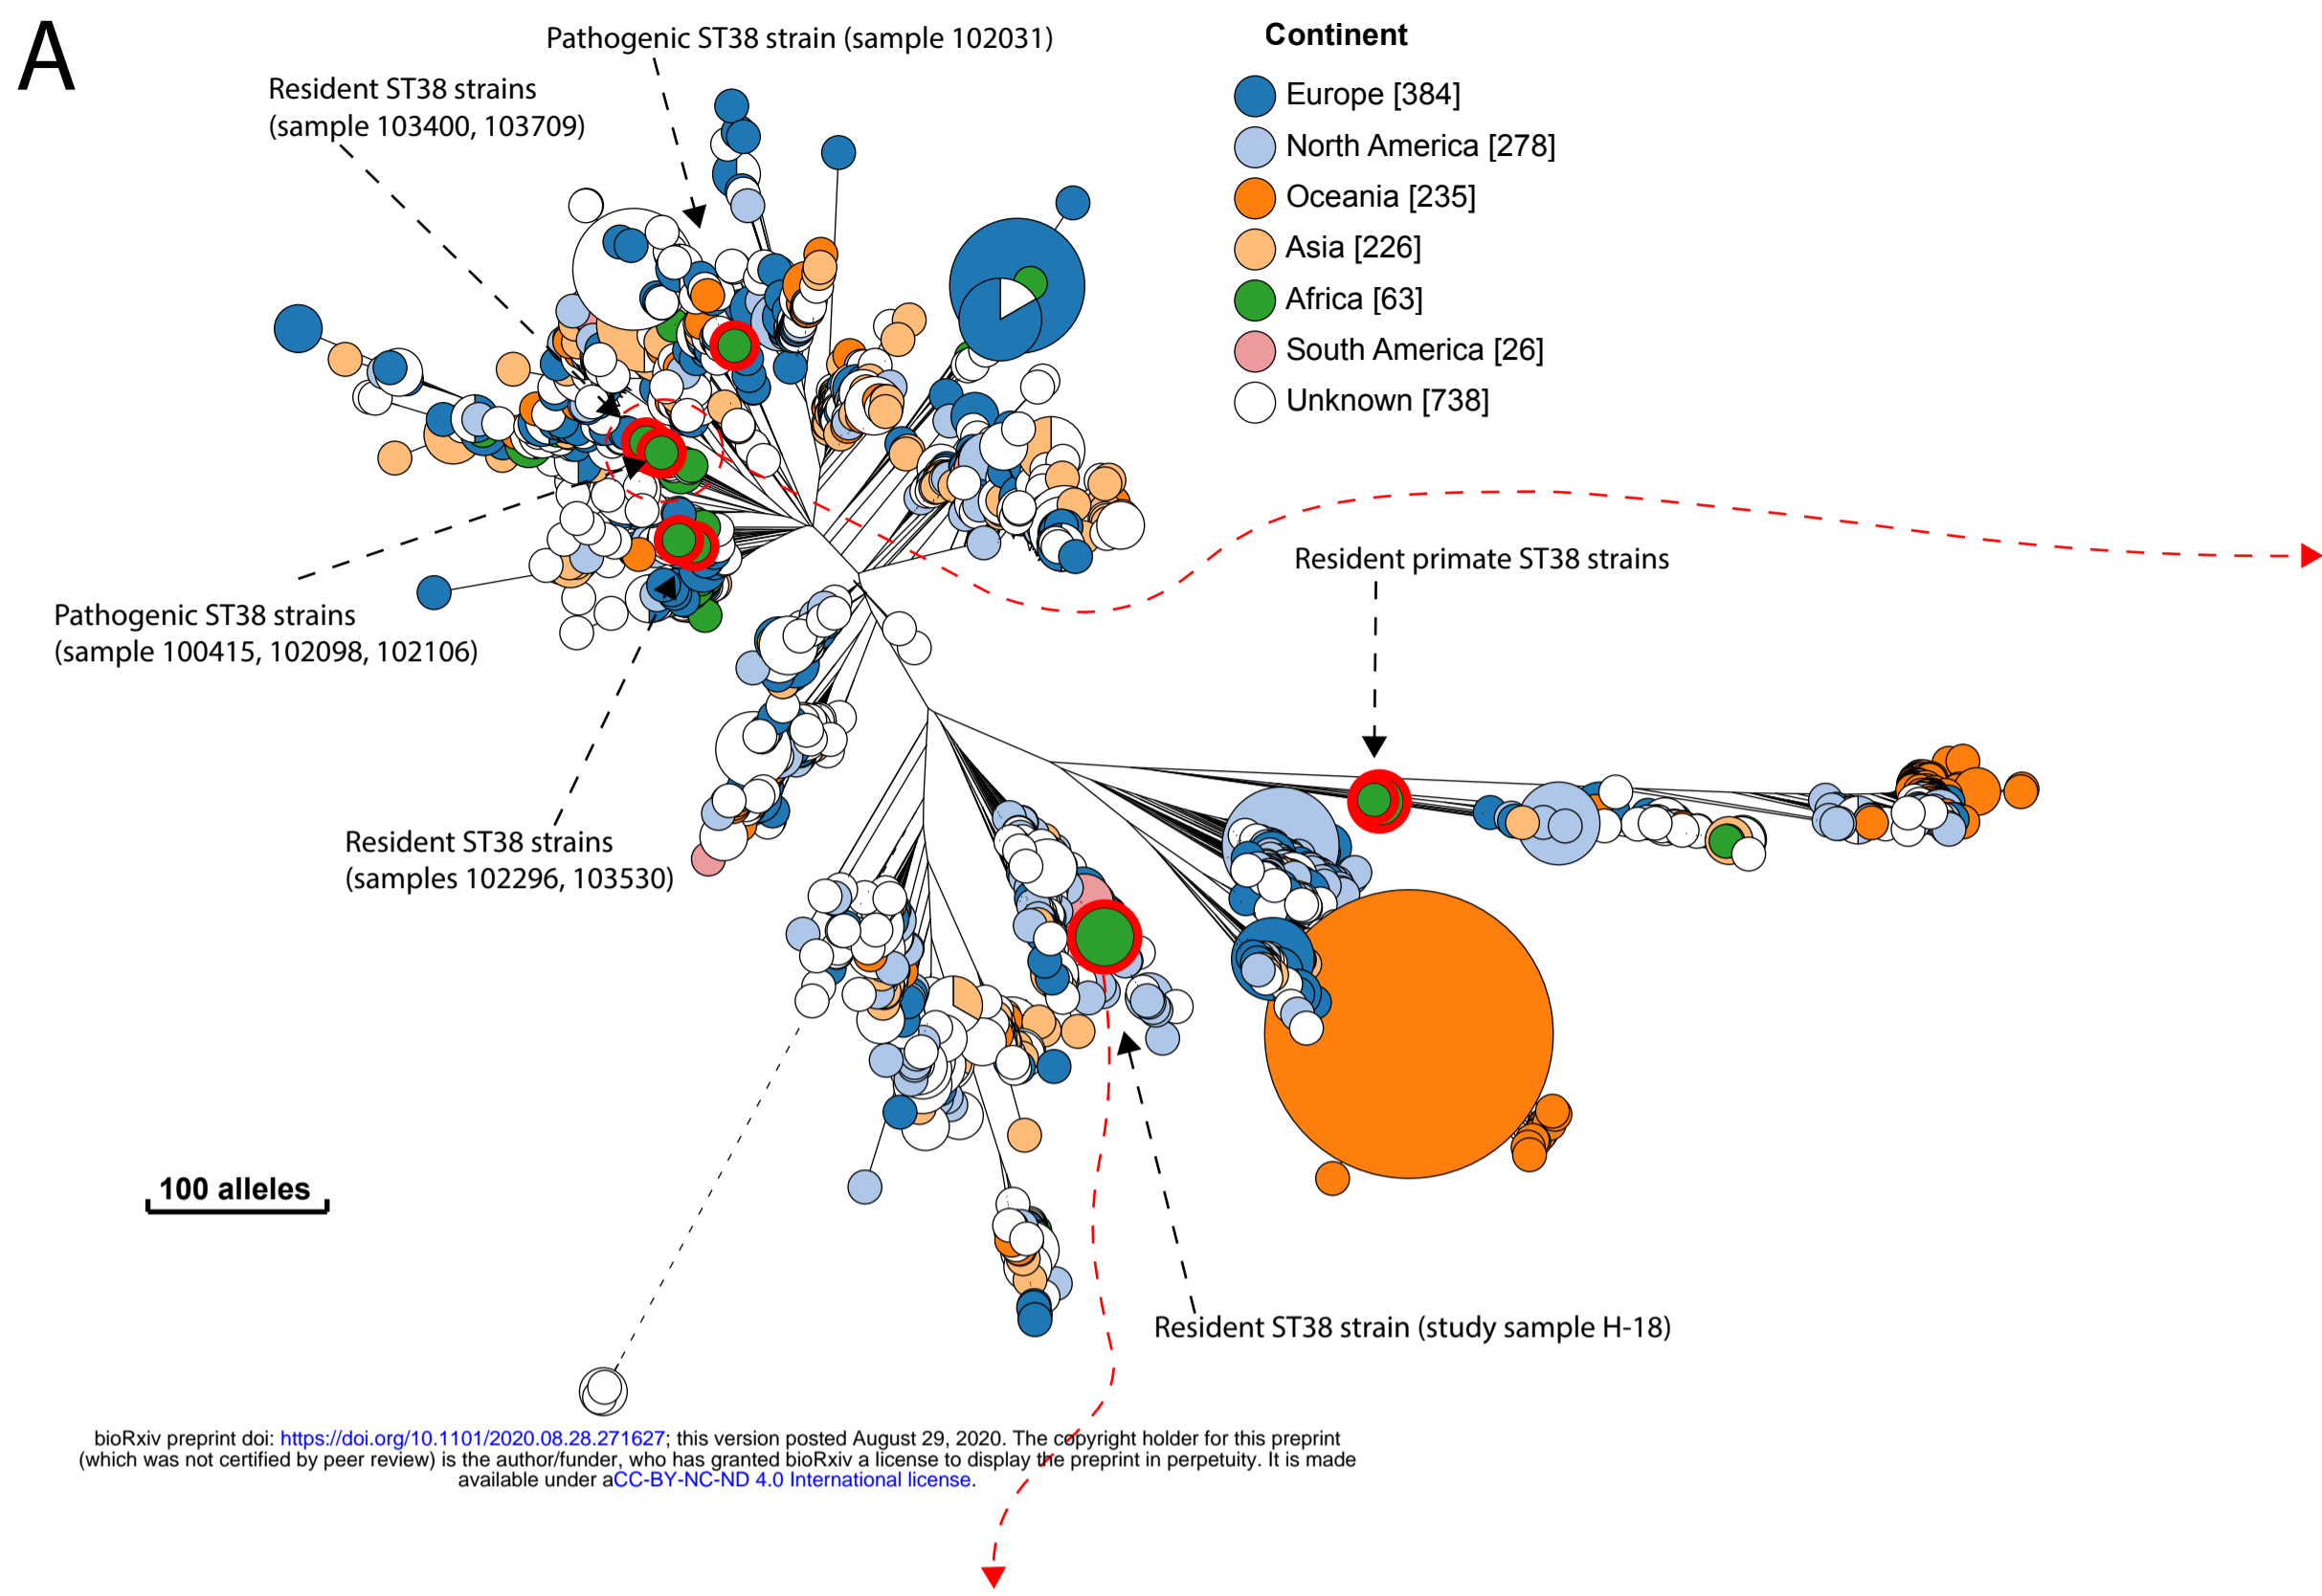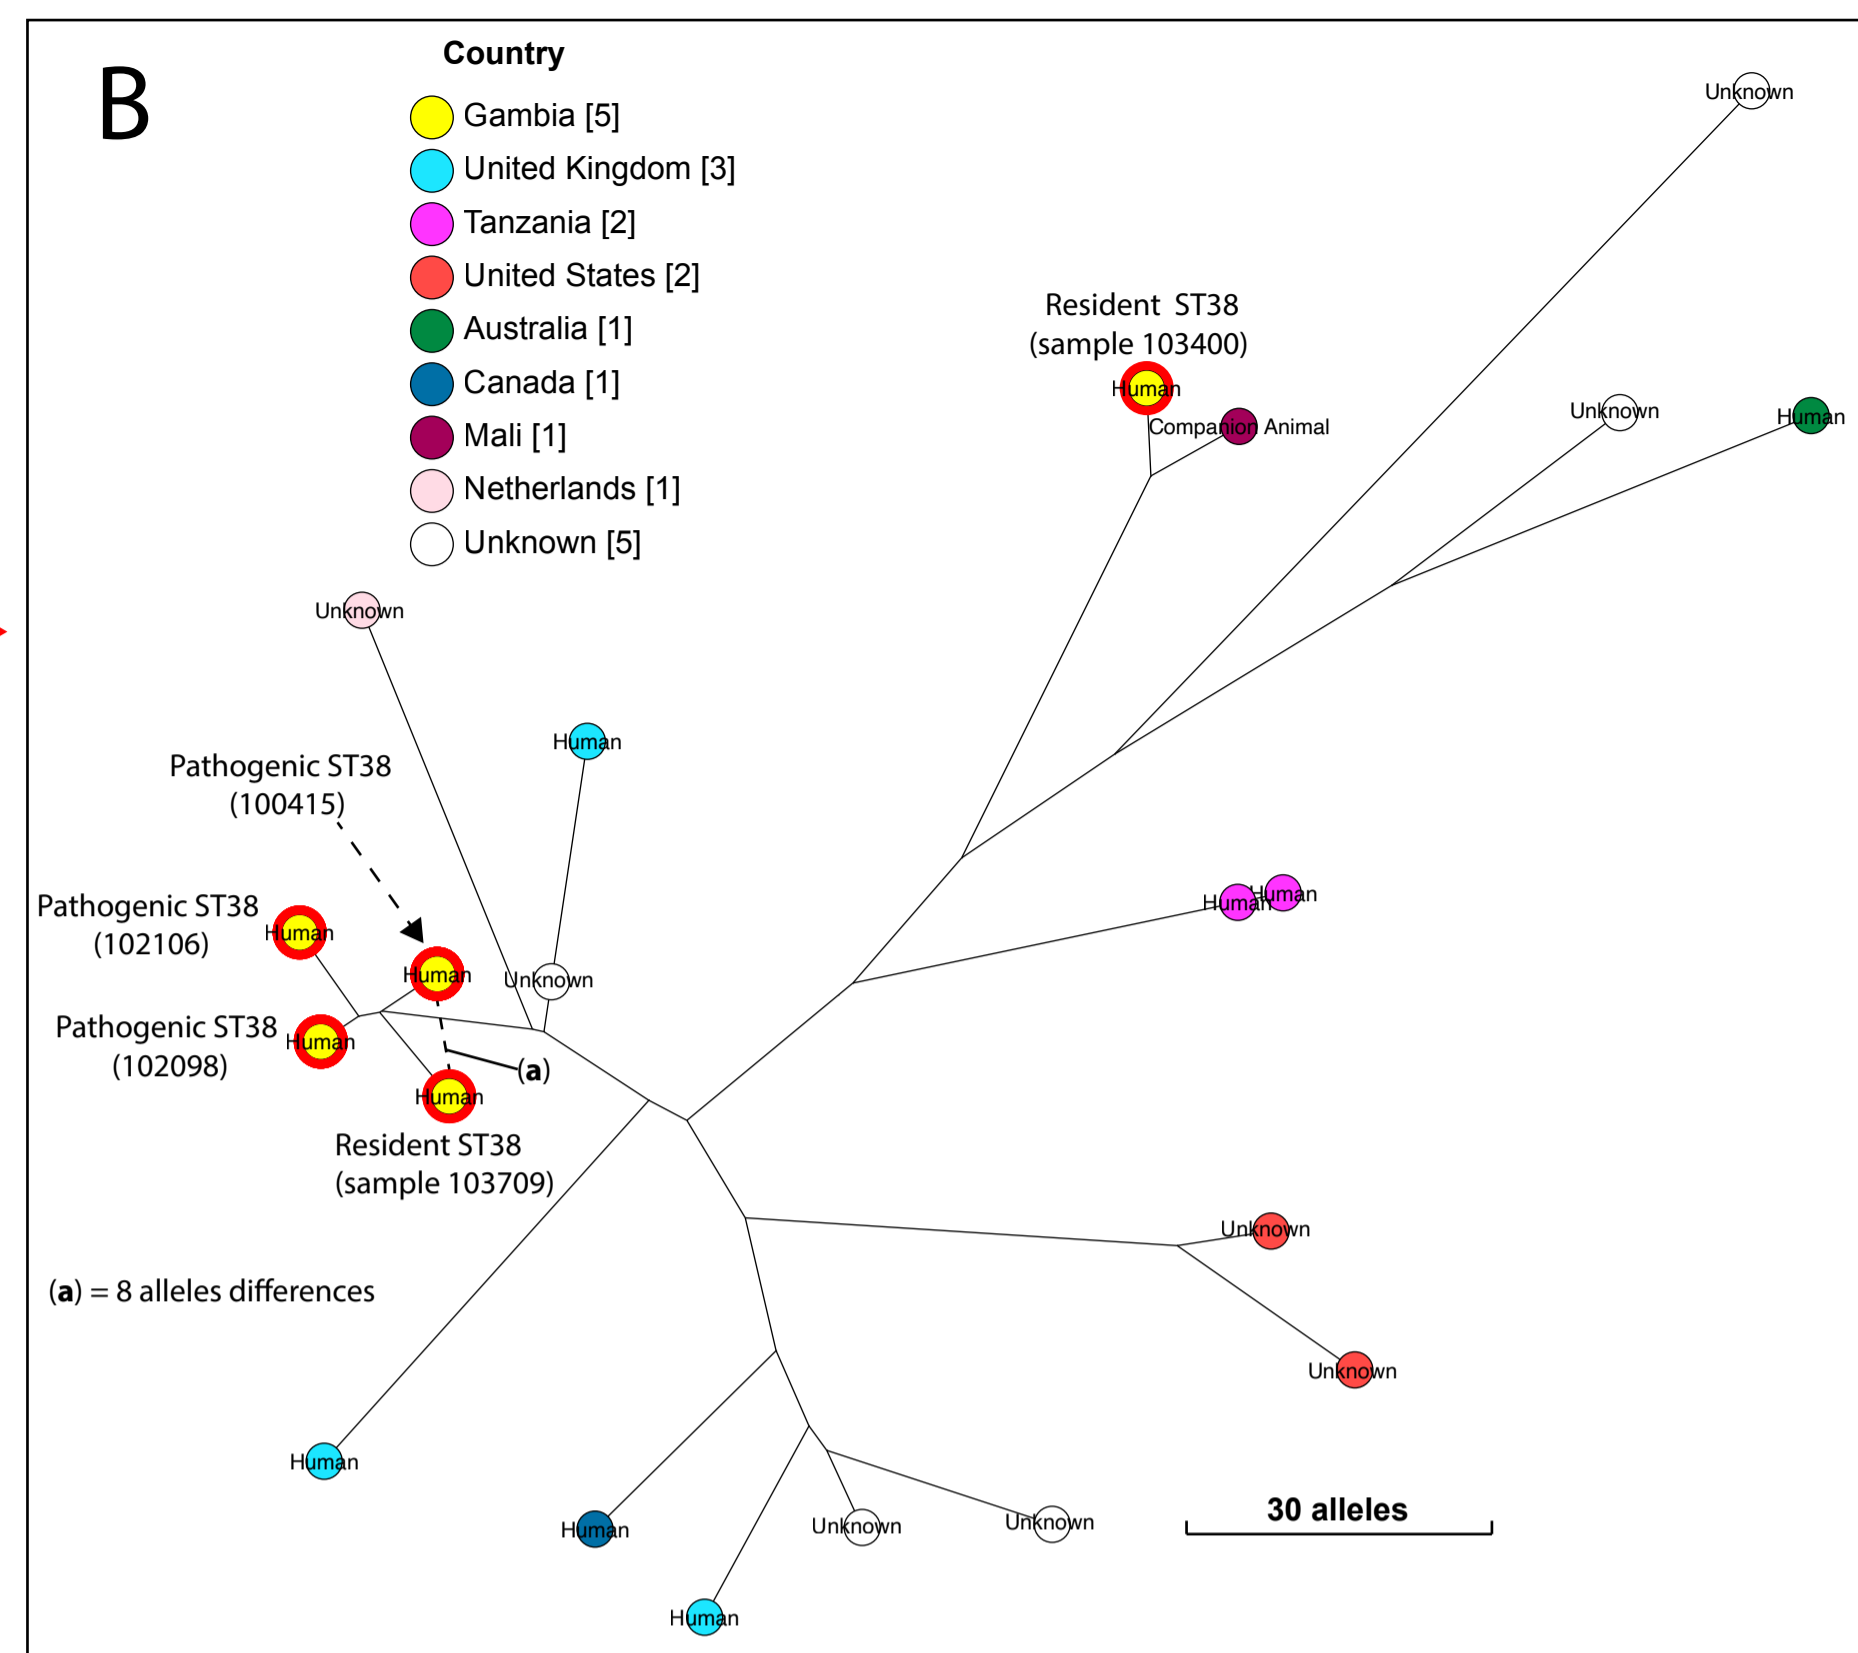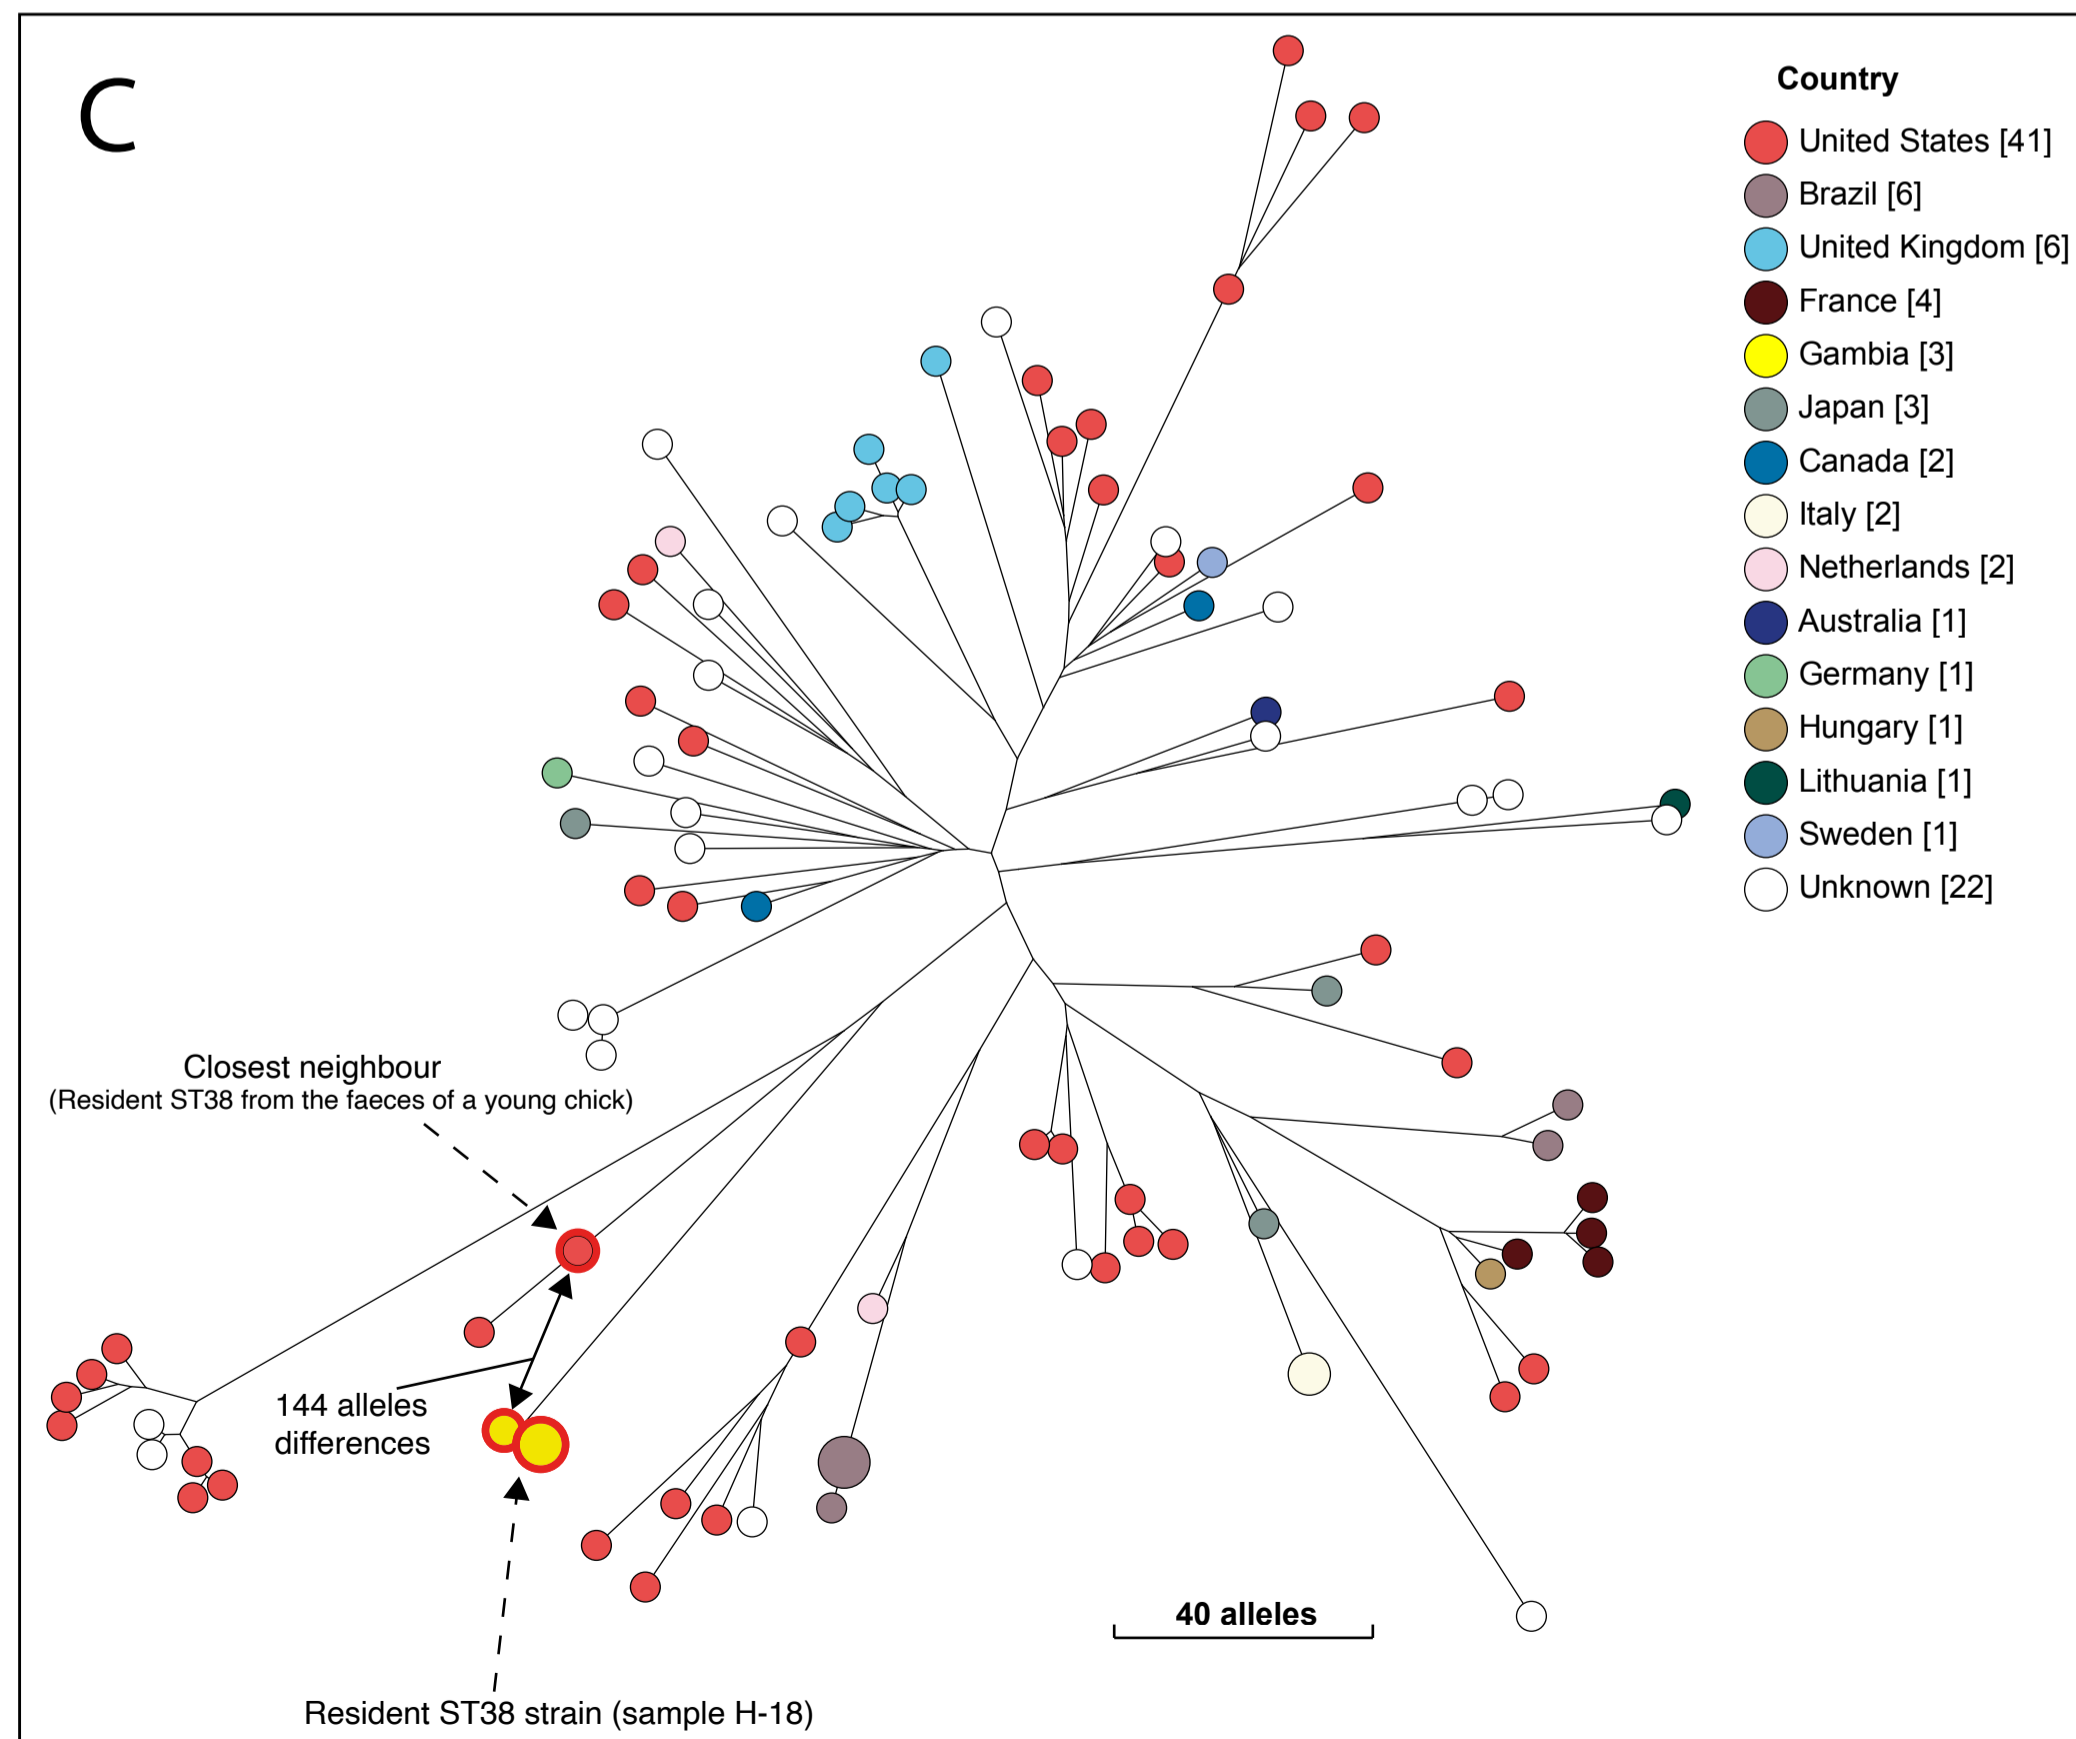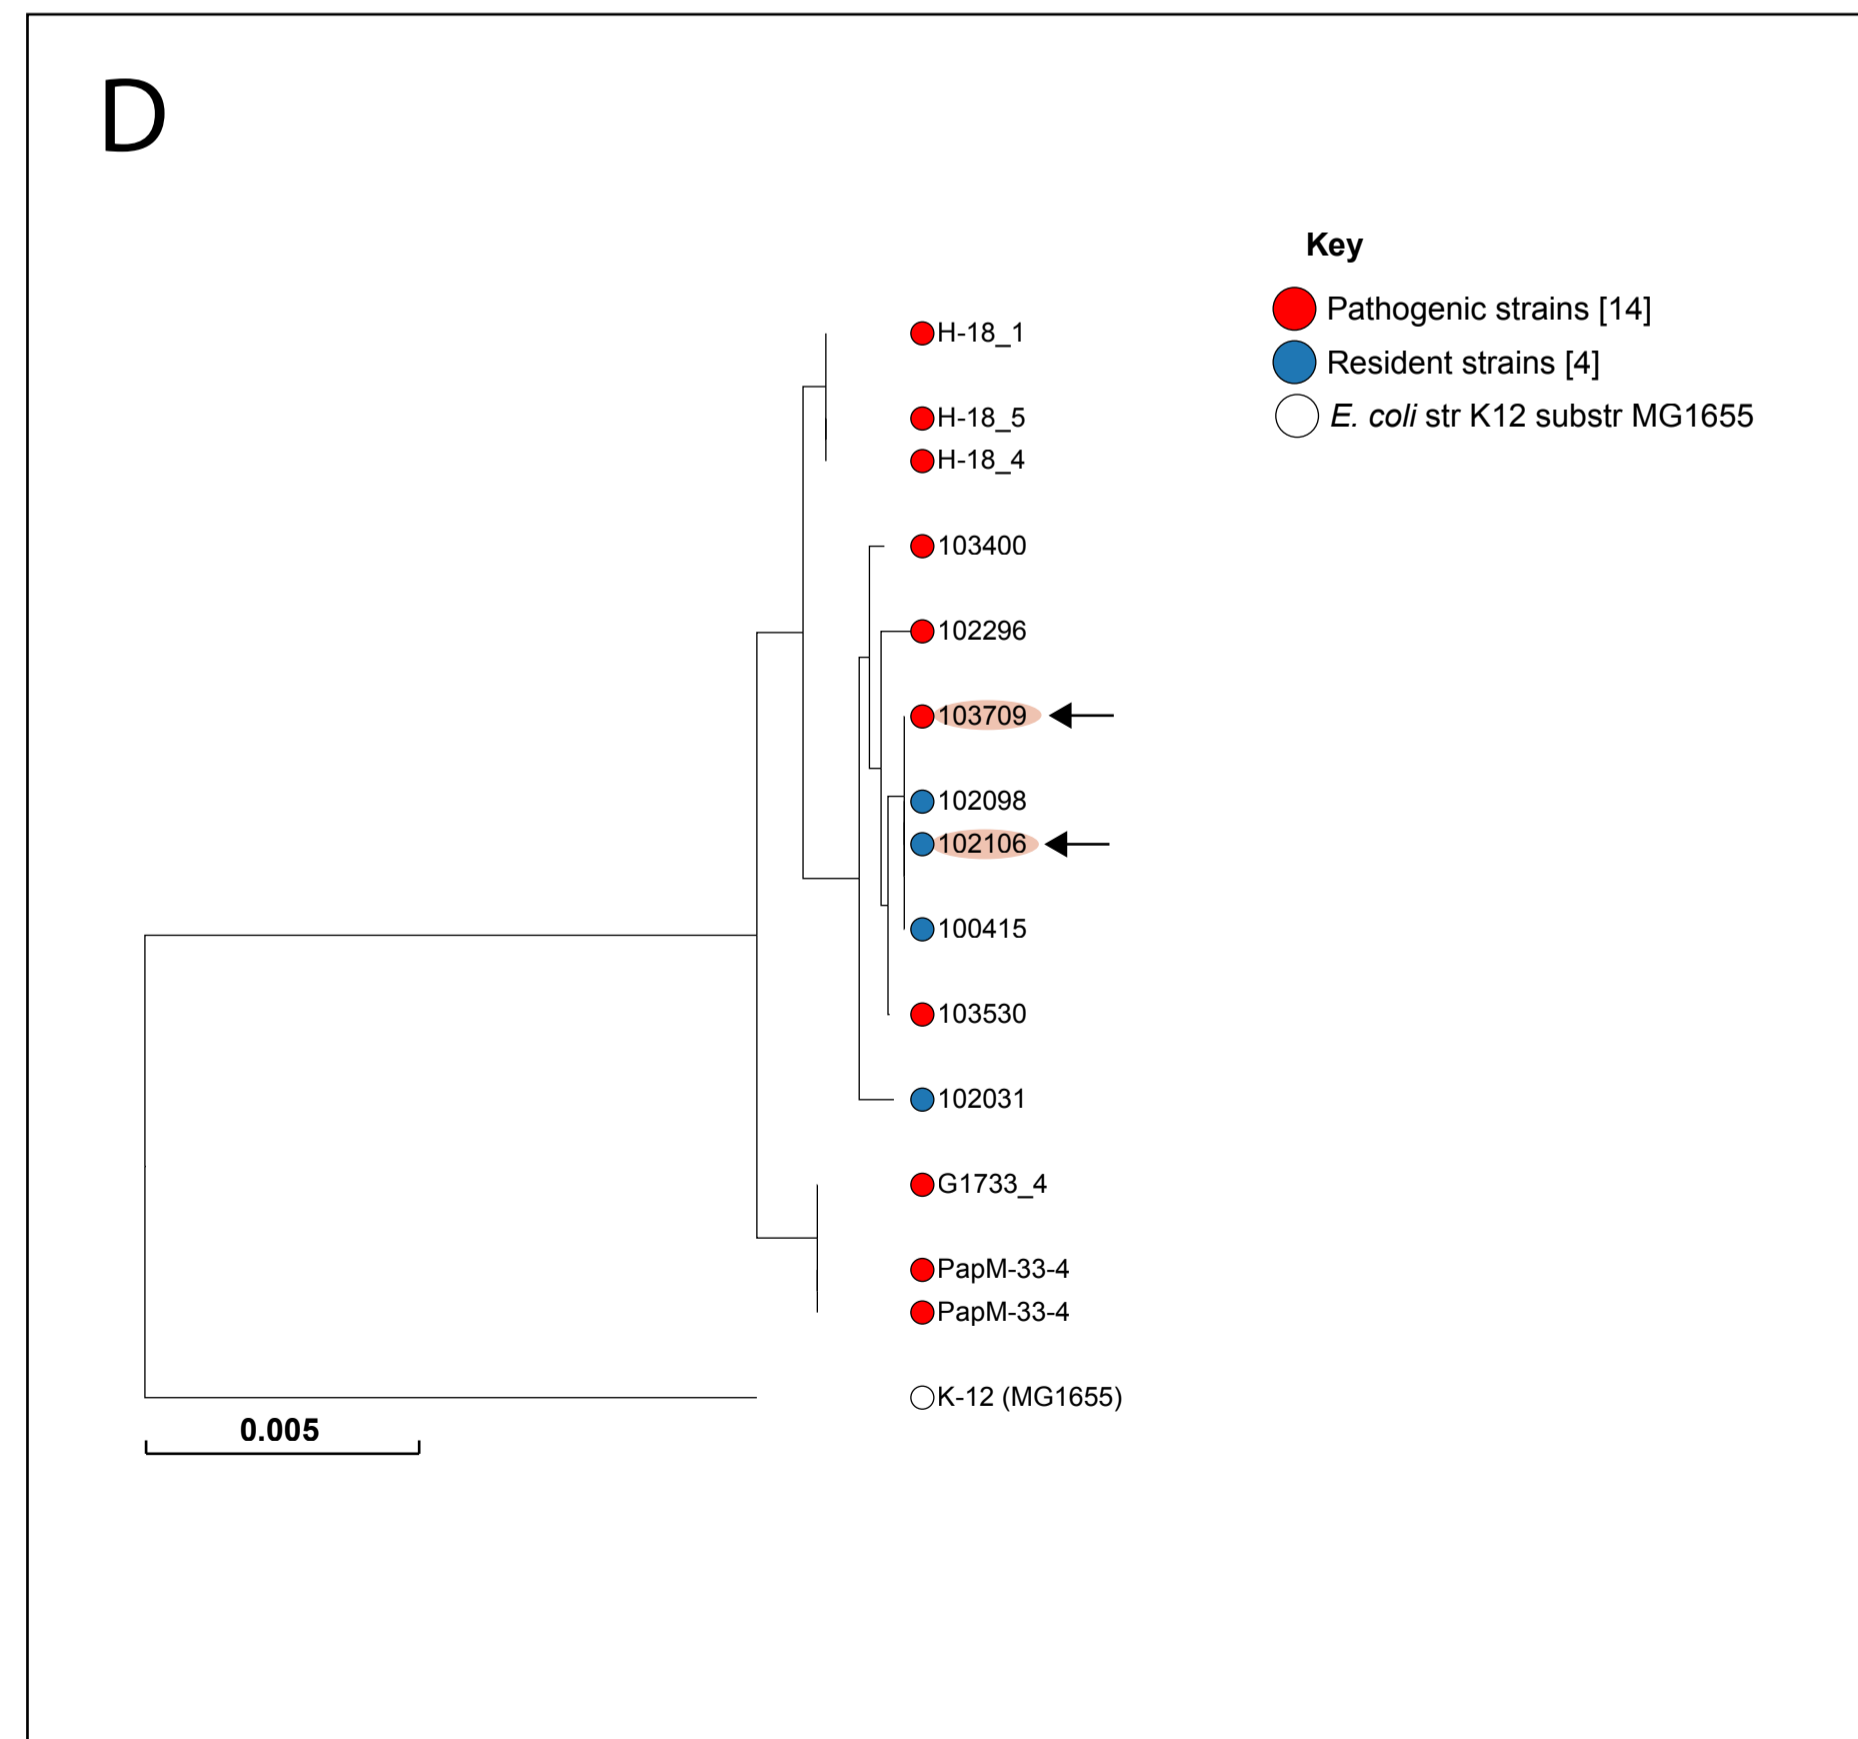

Source: https://www.biorxiv.org/content/biorxiv/early/2020/08/29/2020.08.28.271627.full.pdf
